# Supplementary material for: Systematic review of patient-engagement interventions: potentials for enhancing person-centred care for older patients with multimorbidity
Source: PubMed Central journal article supplement — BMJ Open. 2021 Dec 16;11(12):e048558. doi: 10.1136/bmjopen-2020-048558 (PMC8679112; doi:10.1136/bmjopen-2020-048558), 2021-12-16
Supplement: bmjopen-2020-048558.draft_revisions.pdf [file bmjopen-2020-048558.draft_revisions.pdf]

# BMJ Open

BMJ Open is committed to open peer review. As part of this commitment we make the peer review history of every article we publish publicly available.

When an article is published we post the peer reviewers' comments and the authors' responses online. We also post the versions of the paper that were used during peer review. These are the versions that the peer review comments apply to.

The versions of the paper that follow are the versions that were submitted during the peer review process. They are not the versions of record or the final published versions. They should not be cited or distributed as the published version of this manuscript.

BMJ Open is an open access journal and the full, final, typeset and author-corrected version of record of the manuscript is available on our site with no access controls, subscription charges or pay-per-view fees (<http://bmjopen.bmj.com>).

If you have any questions on BMJ Open's open peer review process please email [info.bmjopen@bmj.com](mailto:info.bmjopen@bmj.com)

# BMJ Open

## **Systematic review of patient-engagement interventions: potentials for enhancing person-centred care for older patients with multi-morbidity**

|                               |                                                                                                                                                                                                                                                                               |
|-------------------------------|-------------------------------------------------------------------------------------------------------------------------------------------------------------------------------------------------------------------------------------------------------------------------------|
| Journal:                      | <i>BMJ Open</i>                                                                                                                                                                                                                                                               |
| Manuscript ID                 | bmjopen-2020-048558                                                                                                                                                                                                                                                           |
| Article Type:                 | Original research                                                                                                                                                                                                                                                             |
| Date Submitted by the Author: | 05-Jan-2021                                                                                                                                                                                                                                                                   |
| Complete List of Authors:     | Søgaard, Mathilde Bendix; University of Copenhagen Faculty of Health and Medical Sciences, Center of Healthy Aging & Department of Public Health<br>Andresen, Katrine; University of Copenhagen,<br>Kristiansen, Maria; University of Copenhagen, Department of Public Health |
| Keywords:                     | PUBLIC HEALTH, GERIATRIC MEDICINE, Quality in health care < HEALTH SERVICES ADMINISTRATION & MANAGEMENT                                                                                                                                                                       |
|                               |                                                                                                                                                                                                                                                                               |

SCHOLARONE™  
Manuscripts

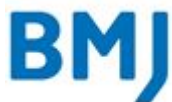

I, the Submitting Author has the right to grant and does grant on behalf of all authors of the Work (as defined in the below author licence), an exclusive licence and/or a non-exclusive licence for contributions from authors who are: i) UK Crown employees; ii) where BMJ has agreed a CC-BY licence shall apply, and/or iii) in accordance with the terms applicable for US Federal Government officers or employees acting as part of their official duties; on a worldwide, perpetual, irrevocable, royalty-free basis to BMJ Publishing Group Ltd ("BMJ") its licensees and where the relevant Journal is co-owned by BMJ to the co-owners of the Journal, to publish the Work in this journal and any other BMJ products and to exploit all rights, as set out in our [licence](#).

The Submitting Author accepts and understands that any supply made under these terms is made by BMJ to the Submitting Author unless you are acting as an employee on behalf of your employer or a postgraduate student of an affiliated institution which is paying any applicable article publishing charge ("APC") for Open Access articles. Where the Submitting Author wishes to make the Work available on an Open Access basis (and intends to pay the relevant APC), the terms of reuse of such Open Access shall be governed by a Creative Commons licence – details of these licences and which [Creative Commons](#) licence will apply to this Work are set out in our licence referred to above.

Other than as permitted in any relevant BMJ Author's Self Archiving Policies, I confirm this Work has not been accepted for publication elsewhere, is not being considered for publication elsewhere and does not duplicate material already published. I confirm all authors consent to publication of this Work and authorise the granting of this licence.

1  
2  
3  
4 **Systematic review of patient-engagement interventions: potentials for enhancing person-centred care**  
5 **for older patients with multi-morbidity**  
6  
7

8 Mathilde Bendix Søgaaard, MSc Public Health, Research assistant, mbs02@live.dk, +4526791119, Center for  
9 Healthy Aging & Department of Public Health, Faculty of Health and Medical Sciences, University of  
10 Copenhagen, Øster Farimagsgade 5, 1014 Copenhagen K, Denmark  
11  
12  
13

14  
15 Katrine Andresen, BSc Public Health, Master student, k\_andresen95@hotmail.com, +4560388971, Center  
16 for Healthy Aging & Department of Public Health, Faculty of Health and Medical Sciences, University of  
17 Copenhagen, Øster Farimagsgade 5, 1014 Copenhagen K, Denmark  
18  
19

20  
21 Maria Kristiansen\*, PhD Public Health, Associate professor, [makk@sund.ku.dk](mailto:makk@sund.ku.dk), +4535334805, Center for  
22 Healthy Aging & Department of Public Health, Faculty of Health and Medical Sciences, University of  
23 Copenhagen, Øster Farimagsgade 5, 1014 Copenhagen K, Denmark  
24  
25  
26

27  
28 \* Corresponding author  
29  
30

31  
32 KEYWORDS: PUBLIC HEALTH, GERIATRIC MEDICINE, QUALITY IN HEALTH CARE  
33  
34

35  
36 Word count: 3636 words  
37  
38  
39  
40  
41  
42  
43  
44  
45  
46  
47  
48  
49  
50  
51  
52  
53  
54  
55  
56  
57  
58  
59  
60

**ABSTRACT**

**Introduction:** Person-centred care based on systematic and comprehensive patient-engagement is gaining momentum across healthcare systems. Providing care that is responsive to the needs, values and priorities of each patient is important for patients, relatives and providers alike, not least for the growing population of older patients living with multi-morbidity and associated complex care trajectories.

**Objectives:** The aim of this systematic review is to investigate the effects of patient engagement interventions for older patients with multi-morbidity.

**Methods:** Systematic review. Two reviewers independently screened the international databases Embase and PubMed. Reviewers carried out duplicate and independent data extraction and assessment of study quality. GRADE (Grading of Recommendations Assessment, Development, and Evaluation) was used to assess the quality of the evidence for each study.

**Results:** We included ten studies with a pooled sample of 7.559 patients from primary care setting and hospitals. The included studies were heterogeneous in terms of characteristics of populations, types of interventions to enhance patient-engagement, outcome measures and length of follow-up. Eight of the ten included studies found significant improvements in health and patient-reported-outcomes such as higher quality adjusted life years, fewer hospital visits and disease specific symptoms. Quality of the included studies was of low to moderate.

**Conclusion:** This review identifies potential beneficial effects of interventions to enhance patient-engagement in older adults with multi-morbidity. Nevertheless, the limited evidence-base calls for more robust studies into efficient approaches to engaging older adults with multi-morbidity in care trajectories.

1  
2  
3  
4  
5  
6  
7  
8  
9  
10  
11  
12  
13  
14  
15  
16  
17  
18  
19  
20  
21  
22  
23  
24  
25  
26  
27  
28  
29  
30  
31  
32  
33  
34  
35  
36  
37  
38  
39  
40  
41  
42  
43  
44  
45  
46  
47  
48  
49  
50  
51  
52  
53  
54  
55  
56  
57  
58  
59  
60

## ARTICLE SUMMARY

### Strengths and limitations of this study

- This systematic review explores the understudied field of interventions to enhance patient-engagement in the growing population of older adults with multimorbidity
- Included studies are not limited to specific health-and patient-reported outcomes in order to capture the broad effectiveness of these interventions
- Meta-analysis was not possible due to heterogeneity in methods and outcomes
- Quality of the included studies was low to moderate overall, hence there is a need for more robust studies using a range of outcomes to identify best practices in patient-engagement in the context of multi-morbidity at old age.

## INTRODUCTION

Person-centred care that is responsive towards each patient's needs, values, resources and life situation is a core value in modern healthcare systems. In increasingly complex and prolonged treatment trajectories, engaging older patients in a timely, systematic and holistic manner may improve experiences and outcomes for patients and relatives, and decrease burn-out and enhance meaningfulness among healthcare professionals. Furthermore, it may support adequate use of scarce healthcare resources as treatment plans are tailored to individual needs, potentially improving engagement of more disadvantaged patients and ultimately decreasing social inequality in healthcare utilization.[1, 2]

Identifying the best care trajectory in the light of the uniqueness of each patient's circumstances is particularly important for the growing population of older patients living with multi-morbidity and associated polypharmacy requiring prolonged and complex care trajectories across care settings.[3-5] In the context of population ageing and increased multi-morbidity, more systematically and timely offered conversations with patients related to future scenarios and priorities is crucial. This includes a range of complex decisions on prognosis, treatment options and prioritizing care at the end of life driven by patient perspectives on what is acceptable and meaningful to him/her. Person-centred care requires empowered patients who are met by a responsive and accessible hospital with a culture of engagement, sufficient time, and a skill-set that nurtures daily practices based on unlocking patient perspectives and delivering coherent care to reflect these.[2, 6, 7] While there is overall agreement concerning the importance of person-centred care, there is little scientific evidence documenting significant outcomes of patient engagement regarding patient satisfaction, enhanced shared decision-making, adjustment of treatment plans, or use of resources.[8-12] A recent systematic review[13] aimed at assessing the effect of the interventions for older patients with multi-morbidity aiming to involve them in decision-making in primary care consultations found too limited evidence to interpret with certainty. The systematic review included only randomised-controlled trial's (RCT) in primary health care. To investigate this topic further we included both RCTs and non-randomised studies in primary and secondary health care setting. More focus on patient-engagement tools as interventions to enhance person-centred care in clinical encounters is needed for providing a more substantive evidence base to guide prioritization and implementation into mainstream healthcare delivery.[14] The aim of the systematic review is to investigate the current evidence for effectiveness of patient-engagement tools in enhancing person-centred care for older adults (60+ year) with more than one disease.

## METHODS

### Literature search and study selection

The review is based on systematic literature searches conducted in December 2019 using the databases PubMed and Embase. Furthermore, reference lists of included articles were assessed to identify additional articles. The complete list of search terms, including MESH terms and free text terms, is presented in Appendix 1.

The software DistillerSR was used to screen and review the studies. Data were independently extracted onto a customised data extraction sheet in DistillerSR by two reviewers, and any discrepancies were resolved by discussion.

The eligibility criteria for study inclusion were as follows:

- Population: Older adults above the age of 60 with more than one disease.
- Intervention: Patient engagement intervention in a hospital and primary care setting.
- Comparison groups: Older patients who received usual care.
- Outcome: Any patient-related outcome e.g. reduced symptoms of disease, reduced duration of disease, reduced costs and reduced hospital stay or rehospitalisation.

We included quantitative observational studies such as prospective and retrospective cohort studies and RCTs. Studies in any geographical area in primary care and hospitals setting were included, and only studies written in English and in one of the Scandinavian languages were included.

Two investigators independently screened the titles, abstracts and full texts for inclusion and exclusion criteria. We excluded commentaries, editorials and studies that did not directly apply a patient-engagement intervention as an exposure. We did not exclude studies based on publication date.

First, the titles of the 603 studies were screened for eligibility. Secondly, duplicates were removed. Third, the abstracts of the studies were screened. Fourth, the full texts of studies initially assessed as relevant for the review were checked against our inclusion or exclusion criteria. Disagreements between the two investigators were resolved by consensus. Figure 1 shows reasons for exclusion for potentially eligible studies.

### Data extraction

Two investigators independently extracted information on characteristics of participants, study design, patient engagement intervention and outcomes. Discrepancies in data extraction were resolved by consensus between the two investigators.

### Quality assessment



1  
2  
3  
4 The included studies encompassed a combination of RCT and observational studies. To assess the quality of  
5 evidence, we used GRADE (Grading of Recommendations, Assessment, Development, and Evaluation) for  
6 all the included studies. GRADE is a transparency framework and is the most widely adopted tool for  
7 grading the quality of evidence. The checklist assesses quality of the study across eight domains. The  
8 evidence level can be rated down or up depending on missing or existing domains. GRADE certainty ratings  
9 have four levels as follows: very low, low, moderate, high. Very low means that the true effect is probably  
10 markedly different from the estimated effect. High means that the authors have a lot of confidence that  
11 the true effect of is similar to the estimated effect,[15]. To assess the domain risk of bias within GRADE we  
12 used two different measures depending on whether the study was randomised or non-randomised. In non-  
13 randomised studies we used ROBINS-I to assess risk of bias, which is a tool to understand and appraise  
14 strengths and weaknesses in non-randomised studies.[16] In RCTs we used Cochrane Collaboration's tool  
15 for assessing risk of bias.[17] Two investigators independently performed a quality assessment of each  
16 study. Disagreements were resolved by consensus.  
17  
18  
19  
20  
21  
22  
23  
24  
25  
26  
27

#### 28 **Patient and Public Involvement Statement**

29 Patients were not involved in this systematic review.  
30  
31  
32

## 33 **RESULTS**

### 34 **Description of included studies**

35 Figure 1 shows the PRISMA diagram in the phases from the 746 studies that were identified to the ten  
36 studies that met the inclusion criteria. The main reason for exclusion were due to lack of specific  
37 interventions. Table 1 depicts the characteristics of the ten included studies. The included studies were  
38 mainly RCT studies.  
39  
40  
41  
42  
43  
44  
45  
46  
47  
48  
49  
50  
51  
52  
53  
54  
55  
56  
57  
58  
59  
60

Table 1: Study characteristics of included studies

| Study                          | Location             | Design                      | Participants                                                                                                                                             | Disease focus                        | Intervention                                                                                       | Setting                                                            | Endpoint                                                |
|--------------------------------|----------------------|-----------------------------|----------------------------------------------------------------------------------------------------------------------------------------------------------|--------------------------------------|----------------------------------------------------------------------------------------------------|--------------------------------------------------------------------|---------------------------------------------------------|
| <b>Hochhalter et al., 2010</b> | USA                  | Randomised Controlled Trial | 26 patients in appointment group, 27 in safety group, and 26 in usual group. Mean age 76 in appointment group, 73 in safety group and 73 in usual group. | Multiple chronic illness             | Patient engagement, patient group workshop and individual coaching intervention.                   | Primary care clinics, Scott & White Center for Diagnostic Medicine | PAM-13, Communication with physician's scale, HRQOL-14, |
| <b>Naik et al. 2019</b>        | USA                  | Randomised Controlled Trial | 136 in the intervention group, and 89 in control group. Mean age 61                                                                                      | Uncontrolled diabetes and depression | Proactive population screening and telephone delivery of a collaborative goal-setting intervention | Veterans Affairs Medical Center                                    | Change in depression symptoms using PHQ-9 and HbA1c.    |
| <b>Reed et al., 2018</b>       | Australia            | Randomised controlled trial | 114 in the intervention group, and 117 in the control group. Age range: 60+                                                                              | Multiple chronic conditions          | Self-management support program for older with multiple chronic conditions                         | General practices                                                  | Self-rated health                                       |
| <b>Salisbury et al., 2018</b>  | England and Scotland | Cluster-randomised trial    | 797 patients in the intervention group, and 759 in the usual care group. Mean age 71 in intervention group and 70,7 in the usual care group.             | Multimorbidity                       | Patient-centered strategies for management of multimorbidity, 3D intervention                      | General practices                                                  | Eq-5d-5l                                                |

| Study                      | Location  | Design                                        | Participants                                                                                                                             | Disease focus         | Intervention                                                                            | Setting                                                                       | Endpoint                                                                                                                                                              |
|----------------------------|-----------|-----------------------------------------------|------------------------------------------------------------------------------------------------------------------------------------------|-----------------------|-----------------------------------------------------------------------------------------|-------------------------------------------------------------------------------|-----------------------------------------------------------------------------------------------------------------------------------------------------------------------|
| <b>Shively et al. 2013</b> | USA       | Randomised, 2-group, repeated-measures design | 43 patients in the Intervention group, and 41 in the control group with usually care. Mean age 66,1 years.                               | Heart failure         | Patient activation intervention compared with usual care in patients with Heart failure | Veterans Affairs San Diego Healthcare System                                  | Patient Activation Measure, (PAM), Self-Care of Heart Failure Index (SCHIF), Medical Outcomes Study (MOS)                                                             |
| <b>Tay et al. 2018</b>     | Singapore | Prospective cohort study                      | 170 in the intervention group and 60 in the control group. Mean age in the intervention group is 82 years and 84 years in control group. | Dementia              | Person-centered care in Care for Acute Mentally Infirm Elders (CAMIE)                   | Hospital                                                                      | Well-being (WB) Ill-being (IB) Pittsburg Agitation Scale (PAS) Modified Barthel Index (MBI) EQ-5D Index Score                                                         |
| <b>Tinsel et al. 2013</b>  | Germany   | Cluster Randomised Controlled Trial           | 552 patients in the intervention group, and 568 in the control group. Mean age 63,8 in intervention group and 65 in control group.       | Hypertension          | Shared decision-making in General practice with patients with uncontrolled hypertension | General practice                                                              | SDM-Q-9, systolic blood pressure                                                                                                                                      |
| <b>Ulin et al. 2016</b>    | Sweden    | Controlled before-and-after design            | 125 patients in the intervention group, and 123 in control group. Mean age range: 77-80.                                                 | Chronic Heart failure | Gothenburg Person-centered care (gPCC) in hospitalized patients                         | Department of Medicine at Sahlgrenska University Hospital/Östra in Gothenburg | Number of days from admission to<br>1. first notice to the municipality<br>2. second notice to the municipality<br>3. notice to the municipality that the patient was |

| Study                        | Location  | Design                             | Participants                                                                                                                                   | Disease focus            | Intervention                                                     | Setting                           | Endpoint                                                                                                                    |
|------------------------------|-----------|------------------------------------|------------------------------------------------------------------------------------------------------------------------------------------------|--------------------------|------------------------------------------------------------------|-----------------------------------|-----------------------------------------------------------------------------------------------------------------------------|
| <b>Wong et al. 2014</b>      | Hong Kong | Observational matched cohort study | 1.141 in the intervention group and 1.141 in the control group. Mean age 64.                                                                   | Type 2 diabetes mellitus | Patient Empowerment Program in General Outpatient Clinics (GOPC) | General Outpatient Clinics (GOPC) | ready for discharge from hospital.<br>HbA1c, Systolic blood pressure (SBP), Diastolic blood pressure (DBP), LDL-cholesterol |
| <b>Willadsen et al. 2018</b> | Denmark   | Randomised Controlled Trial        | 970 patients in the intervention group and 539 in the group with usual care. Mean age 64,7 in intervention group and 64,5 in usual care group. | Diabetes                 | Structured personnel care in patients with diabetes              | General practice                  | Self-rated health, diabetes symptoms                                                                                        |

1  
2  
3  
4 This systematic review is based on a pooled sample of 7559 patients, from the ten included studies. The  
5 sample sizes ranged widely across studies (mean: 756 patients, median 231/248 patients, range 79-2282).  
6 Four studies (40%) were conducted in the Europe, three (30%) in US, and three (30%) elsewhere. The most  
7 common study design was RCT (n=7; 70%) followed by Cohort/observational (n=3; 30%). Most studies were  
8 conducted in primary care setting (n=6; 60%). A total of four studies (40%) were conducted in general  
9 hospitals involving patients from a range of specialties. In the studies, the participants have many different  
10 diseases such as diabetes, chronic heart failure, dementia etc. The mean age in the studies was +60 years  
11 with a range: 60- 84 years, however, there were two studies that did not indicate the mean age but  
12 included an 18+ year population with most 60+ years.

13  
14  
15  
16  
17  
18  
19 Four studies included a population with two or more chronic diseases. Three studies included people with  
20 diabetes and at least one comorbidity. Three studies included people with one main disease and other  
21 comorbidities.  
22

23  
24 The included studies used different patient engagement interventions such as goal setting interventions  
25 and disease-specific sessions. Different types of primary outcomes were used in studies such as Patient  
26 Activations Measurements (PAM), Self-Rated health (SRH) and EQ-5D.  
27  
28  
29

### 30 31 **Quality of included studies**

32  
33 Figure 2 shows the quality assessment for each included study. Three studies were assessed to be of high  
34 quality in all domains apart from one, which was judged to be low or moderate. An additional three studies  
35 were assessed to be of high quality apart from two domains, which was judged to be low or moderate. The  
36 last four studies were only judged to be of high quality in one or none of the five domains.  
37  
38  
39

40  
41 Risk of bias for RCTs is shown in figure 3. All studies had high risk of bias due to blinding of participants and  
42 personnel (performance bias). Furthermore, four studies were rated to high risk of blinding of outcome  
43 assessment (detection bias).[18-21]  
44  
45

46  
47 Figure 4 show risk of bias for non-randomised studies. Two studies were rated to have high risk of bias, and  
48 one study was rated moderate risk of bias. One study had high risk of bias due to confounding,[22] and  
49 another study had high risk of bias due to deviations from intended intervention.[23] The study rated to  
50 moderate risk of bias had moderate risk of bias in five categories.[24] All three studies had unclear risk of  
51 bias in more than one category.  
52  
53  
54

55  
56 In total, the quality of the included studies was of low to moderate and some aspects of quality assessment  
57 and risk of bias were unclear across the included studies.  
58  
59  
60

## Effect of the interventions

The included studies are using different endpoints to measure the effect of patient engagement interventions. Eight of the included studies found significant effect of interventions.

A RCT by Naik[25] measure the effect of the intervention Healthy Outcomes Through Patient Empowerment (HOPE) which is a six-months goal-setting intervention targeting depression symptoms and diabetes self-care through nine telephone-delivered coaching sessions. The HOPE intervention used an electronic data warehouse to identify specific high-risk population, followed by telephone screening and training of clinicians to deliver a structured telehealth intervention. The endpoints in this study was depression symptoms with The Patient Health Questionnaire (PHQ)-9 and glycaemic control with haemoglobin A1c (HbA1c). They did not find any improvement in six-month follow-up, but found improvement in PHQ-9 after 12-month follow-up; HOPE (Mean [SD] baseline: 15,8 [4,2] to six months: 10,9 [6,1] and 12 months 10,1 [6,5] ) compared with Enhanced Usual Care (EUC) (Mean [SD] baseline 16,2 [4,0] to six months 12,4[6,0]) and 12 months 12,6 [6,0]. The PHQ-9 differences between HOPE and EUC were statistically significant at six months (mean diff., 1.74; 95% CI, 0.14-3.33; P = 0.03) and 12 months (mean diff., 2.14; 95% CI, 0.18-4.10; P = 0.03).

The study by Reed[26] examined the effect of the intervention Chronic Disease Self-Management Support (CDSMS) which is a set of tools (Partners in Health scale, Cue and Response interview, Problems and Goals assessment) and a structured process that enable clinicians and patients to collaboratively assess self-management behaviour, identify problems, set goals, and develop individual care plans that address key self-care, medical, psychosocial, and care problems. Participants in each program received three home visits and four follow-up phone calls over a six-month period from a clinician. The population were recruited from five general practices in Adelaide, Australia. The study used self-rated health as endpoint, and they with an intention-to-treat analysis that CDSMS participants were more likely than control participants to report improved self-rated health at six months (R, 2.50; 95% confidence interval, 1.13-5.50; P = 0.02).

A RCT by Shively[19] implemented a six month program developed to enhance self-management in older heart failure patients. The program consisted of individualized goal setting according to baseline activation level. The interventions population was invited to participate through a follow-up visit at the Veterans Affairs San Diego Healthcare system. The study used Patient Activation Measure (PAM), Self-Care of Heart Failure Index (SCHFI), Medical Outcomes Study (MOS), and hospital visits to measure the effect of the intervention. The intervention showed improvement in PAM-score, the intervention group compared with

1  
2  
3  
4 the usual care group showed a significant increase in PAM-scores from baseline to six months (significant  
5 group by time interaction,  $F = 3.73$ ,  $P = 0.03$ ) and fewer hospital visits compared with usual group.  
6  
7

8 A prospective naturalistic cohort study by Tay[22] examined the effect of the intervention Care for Acute  
9 Mentally Infirm Elders (CAMIE) which adopt a person-centred care protocol with specialized psychosocial  
10 interventions, minimally obtrusive medical care, and physical restraints-free practice targeting patients  
11 with dementia. The study population were recruited at a hospital, and all patients received standard  
12 treatment. Patients were admitted to the CAMIE unit if they suffered from confusion due to dementia,  
13 with/without delirium based on the confusion assessment method criteria, and concomitant acute medical  
14 problems. The study used Modified Barthel Index function and Well-being and European Quality of Life  
15 (EuroQol) to measure the CAMIE intervention. CAMIE patients showed statistically significant greater gains  
16 in Modified Barthel Index function (mean [SD] baseline 47.31 [28.90] to 55.58 [29.37]) and well-Being  
17 (mean [SD] baseline 4.94 [3.95] to 8.46 [3.49]), decreased ill-Being and agitation (mean [SD] baseline 3.04  
18 [2.11] to 0.84 [1.26]), and greater improvement in EuroQoL index score (mean [SD] baseline -0.16 [0.43] to  
19 0.15 [0.41]) after adjusting for baseline differences that translated to a quality-adjusted life years gain of  
20 0.045, assuming stability over three months.  
21  
22  
23  
24  
25  
26  
27  
28  
29

30 A controlled before-and-after design by Ulin et al[24] studied the effect of proactive care-planning based on  
31 Gothenburg Person-Centred Care (gPCC). It seeks to identify patient's resources including motivations and  
32 goals. This information is used to develop a health plan which includes planned investigations, length of  
33 stay in hospital and treatment goals. The health plan is discussed with the patient to reach consensus and  
34 the plan is regularly evaluated. The population were recruited from five designated wards at a University  
35 Hospital in Sweden. The patients were assessed by a specialised cardiologist before final inclusion, guided  
36 by the European Society of Cardiology (ESC) guidelines for diagnosing Congestive Heart Failure (CHF). The  
37 study used discharge destination and number of days until the discharge was recorded, to measure the  
38 gPCC intervention. They found improved discharge processes (1-5 days for gPCC group vs 1-28 days for  
39 control group), and fewer days in hospital (11 days for gPCC group vs 35 days for control group).  
40  
41  
42  
43  
44  
45  
46  
47

48 A RCT by Willadsen[27] examined the effect of structured personal diabetes care with general practitioners  
49 (GPs) that ask GPs and patient to agree on the best possible goal for controlling risk factors. GPs were  
50 offered six seminars and were instructed to give advice lifestyle. Patients were invited to attend follow-up  
51 examination quarterly and screening for diabetes complications every year. The study used self-rated  
52 health and diabetes symptoms to measure the effect of the structured person care intervention. They  
53 found that the intervention reduced the diabetes symptoms (OR 0.79; 95% CI: 0.64–0.97), but they didn't  
54 find the same after 14 years follow-up.  
55  
56  
57  
58  
59  
60

1  
2  
3  
4 An observational matched cohort study by Wong[23] implemented a Patient Empowerment Programme  
5 (PEP) that aims to provide patient with knowledge and skills about their disease Type 2 Diabetes (T2DM)  
6 and to facilitate autonomous self-regulation. The program consisted of generic sessions about self-efficacy  
7 enhancement and lifestyle modification as well as disease-specific sessions for a period of up to 12 months.  
8  
9 Two non-government organisations (NGO) delivered the intervention, the NGO's invited at general  
10 outpatients' clinics or family medicine specialist eligible patients to join the PEP. The study used HbA1c,  
11 Systolic Blood Pressure (SBP), Diastolic Blood Pressure (DBP), and Low-Density Lipoprotein (LDL-C) to  
12 measure the effect of PEP. They found improvement in the clinical outcomes. A significantly greater  
13 percentage of patients in the PEP group attained HbA1C  $\leq 7\%$  or LDL-C  $\leq 2.6$  mmol/L at 12-month follow-up  
14 compared with the non-PEP group. PEP group had a mean 0.813 fewer General Outpatient Clinic (GOPC)  
15 visits in comparison with the non-PEP group.  
16  
17

18  
19  
20  
21  
22  
23 A study by Hochhalter[21] measured the effect of Making the Most of Your Healthcare intervention which  
24 offered tools and taught skills to (a) prepare for healthcare appointments, (b) communicate effectively and  
25 gather information and support during healthcare appointments, and (c) follow through on plans of care.  
26  
27 The intervention included a two-hour workshop and two telephone calls individualized to the patient's pre-  
28 and post-healthcare appointment needs. The included population were patients in a large Internal  
29 Medicine Clinic and had been treated for at least two of seven chronic illnesses. They found a statistically  
30 significant improvement in self-efficacy for the intervention group, who received a 2-hour workshop. They  
31 used PAM-13 and Health Related Quality of Life (HRQOL)-14 questionnaires as measurement. They found  
32 an improvement in Self-Efficacy in the Appointment group (mean [SD] baseline 6,9 [1,9] to 7,4 [1,8]) mean  
33 diff. 0,47 95%CI; 0,07-0,87 P = 0,021. They did not find any improvement in health for the control group or  
34 safety group.  
35  
36  
37  
38  
39  
40  
41

42 Whereas the studies described above did show some improvements of patient-engagement interventions  
43 in multi-morbid older patients based on a range of outcomes, the following two studies did not find any  
44 significant improvements in health outcomes.  
45  
46  
47

48 A pragmatic cluster-randomised trial by Salisbury[20] examined the effect of the so-called 3D intervention  
49 which is based on a patient-centred care model and seeks to improve continuity, coordination, and  
50 efficiency of care by replacing disease-focused reviews of each health condition with one 6-monthly  
51 comprehensive multidisciplinary review. Each 3D review consists of two appointments with a nurse and a  
52 named responsible physician and a records-based medication review by a pharmacist. The population were  
53 recruited from three general practices providing National Health Service (NHS) primary medical in England  
54 and Scotland. They measured quality of life with a 5Q-5D-5L questionnaire. The intention-to-treat analysis  
55  
56  
57  
58  
59  
60



1  
2  
3  
4 showed no difference between trial groups (adjusted difference in mean EQ-5D-5L 0.00, 95% CI -0.02 to  
5 0.02; p=0.93). They concluded the intervention did not improve the participant's quality of life.  
6  
7

8 The study by Tinsel[18] implemented a shared decision-making (SDM) training program that aims to  
9 enhance the active role of patients. The program included disease information, physician-patient  
10 communication, steps of SDM, motivational interviewing, decision table listing, and role plays simulating  
11 consultations. The GP's followed a SDM training programme, and the study population was conducted  
12 through GP's in southwest Germany. They used change of patients' perceived participation (SDM-Q-9) and  
13 change in systolic blood pressure (BP). According to the mixed model analysis, the average change from T0  
14 was 3.11 points higher in the intervention group than in the control group (97.5% CI [-2.37; 8.61], p =  
15 0.203). The effect was not significant at the (Bonferroni-corrected) 2.5% level. They did not find any  
16 statistically significant improvement in systolic BP.  
17  
18  
19  
20  
21  
22  
23  
24  
25

## 26 **DISCUSSION**

### 27 **Statement of principal findings**

28  
29 This systematic review aimed to provide an overview of the effects of patient engagement interventions for  
30 older patients with multi-morbidity. From the 746 studies identified, only ten studies met the inclusion  
31 criteria. The included studies were heterogeneous in characteristics of populations, number of participants,  
32 types of interventions to enhance patient-engagement, length of follow-up and outcome measures. The  
33 majority of studies showed improvements in health and patient-reported outcomes among patients  
34 exposed to patient engagement interventions. There was some evidence to indicate that the clinical  
35 outcomes (BP, Hba1c, diabetes symptoms and glycaemic outcomes) were improved. Furthermore, some  
36 evidence indicates improvements in quality of life (EuroQol, QALY, self-rated health) and fewer health care  
37 visits (hospitals, GOPC). However, one study found no significant improvements in quality of life and  
38 another study found no significant improvements in BP. As indicated by the limited number of studies and  
39 the wide heterogeneity in characteristics of populations, types of interventions to enhance patient-  
40 engagement, outcome measures and length of follow-up, there is a need for more substantial studies  
41 evaluating patient-engagement tools for both implementation and effect in older patients with multi-  
42 morbidity using more longer-term outcomes to capture both patient, provider and system-level effects of  
43 patient-engagement. While our review adds to the important field of ensuring that interventions to  
44 enhance patient-engagement are developed, implemented and evaluated specifically in the growing  
45  
46  
47  
48  
49  
50  
51  
52  
53  
54  
55  
56  
57  
58  
59  
60

1  
2  
3  
4 population of older adults living with multi-morbidity, the review supports previous work in finding too  
5 fragile evidence for robust conclusions to be made.[8-13]  
6  
7

### 8 **Strengths**

9

10 This review has several strengths. This review contributes to providing a more substantive evidence base to  
11 guide prioritisation and implementation into mainstream healthcare delivery. Since patient-engagement  
12 aims at improving care overall, this review did not restrict itself to studies based on particular health  
13 outcomes, and consequently studies into a range of health and patient-reported outcomes were included.  
14 Another strength is that the systematic literature search that was undertaken adhering to a pre-specified  
15 protocol. To standardise our assessment process, we used DistillerSR to upload the bibliographic reference  
16 information. We performed a wide search to allow different study designs to include methodological  
17 heterogeneity. However, the majority of the included studies were RCT. Two researchers independently  
18 selected studies collected data and rated quality of included studies using GRADE method. Discrepancies  
19 were resolved by consensus. We used a transparent framework for developing and presenting summaries  
20 of evidence. GRADE is the most widely adopted tool for grading the quality of evidence.  
21  
22  
23  
24  
25  
26  
27  
28  
29  
30

### 31 **Limitations**

32

33 Despite of the systematic approach adopted; this review has its limitations. The literature search was  
34 completed using two key databases, but additional articles might have been found by searching and  
35 including from a broader range of sources. Relevant articles were excluded if they were published in  
36 languages other than English, Danish, Swedish, or Norwegian. A minority of the included studies had small  
37 participant numbers which might have affected power of the studies. Two studies included less than 100  
38 patients in total. Meta-analysis was not conducted as there was heterogeneity in the outcomes and  
39 measurement tools used in the studies. Overall, the quality of the included studies was of low to moderate.  
40 Some aspects of quality assessment and risk of bias were unclear across the included studies. This  
41 complicates the overall quality assessment. Furthermore, we did not seek clarification with the study  
42 authors about whether our assessment of risk of bias in the individual studies was correct.  
43  
44  
45  
46  
47  
48  
49  
50

### 51 **Implications**

52

53 This review has highlighted the possible improvements in health and patient-reported outcomes among  
54 patients exposed to patient-engagement interventions. However, the evidence base is inconsistent and  
55 the quality of the studies is relatively low. Further high quality studies in larger populations over longer  
56 time-periods are needed to investigate the long-term effect of patient-engagement interventions.  
57  
58  
59  
60

1  
2  
3  
4  
5  
6  
7  
8  
9  
10  
11  
12  
13  
14  
15  
16  
17  
18  
19  
20  
21  
22  
23  
24  
25  
26  
27  
28  
29  
30  
31  
32  
33  
34  
35  
36  
37  
38  
39  
40  
41  
42  
43  
44  
45  
46  
47  
48  
49  
50  
51  
52  
53  
54  
55  
56  
57  
58  
59  
60

## CONCLUSION

This systematic review found only limited evidence to support the improvements in health and patient-reported outcomes among older multi-morbid patients exposed to patient-engagement interventions. As the quality of the included studies was mostly low, the findings should be interpreted with caution, and there is a need for more robust studies into efficient approaches to engaging older adults with multi-morbidity in care trajectories.

## DECLARATION OF CONFLICTING INTERESTS

The authors declare no potential conflicts of interest with respect to the research, authorship and/or publication of this article

## FUNDING

The authors disclosed receipt of the following financial support for the research, authorship, and/or publication of this article: This work was supported by [Nordea-fonden] grant number [02-2013-0200].

## AUTHOR CONTRIBUTIONS

MBS and KA contributed equally to this paper. MK, MBS and KA designed the study. MBS and KA carried out data collection and analysis. All authors contributed to drafting the manuscript. All authors have read and approved the manuscript.

## DATA AVAILABILITY STATEMENT

Data from the literature search and selection process are available upon reasonable request to the corresponding author.

## FIGURES

## REFERENCES

1. Hargraves I, Montori VM, Tilburt JC. Curare Aude-Caring for Patients, with Them. *J Clin Ethics*. 2020;31(1):79-82.
2. Pieterse AH, Stiggelbout AM, Montori VM. Shared decision making and the importance of time. *JAMA*. 2019;322(1):25-6.

- 1  
2  
3  
4 3. Davies LE, Spiers G, Kingston A, Todd A, Adamson J, Hanratty B. Adverse Outcomes of Polypharmacy in  
5 Older People: Systematic Review of Reviews. *Journal of the American Medical Directors Association*.  
6 2020;21(2):181-7.  
7
- 8 4. Uijen AA, van de Lisdonk EH. Multimorbidity in primary care: Prevalence and trend over the last 20 years.  
9 *EJGP*. 2008;14(sup1):28-32.  
10
- 11 5. van Oostrom SH, Gijzen R, Stirbu I, Korevaar JC, Schellevis FG, Picavet HSJ, et al. Time Trends in  
12 Prevalence of Chronic Diseases and Multimorbidity Not Only due to Aging: Data from General Practices and  
13 Health Surveys. *PLoS one*. 2016;11(8):e0160264.  
14
- 15 6. Spencer-Bonilla G, Thota A, Organick P, Ponce OJ, Kunneman M, Giblon R, et al. Normalization of a  
16 conversation tool to promote shared decision making about anticoagulation in patients with atrial  
17 fibrillation within a practical randomized trial of its effectiveness: a cross-sectional study. *Trials*. 2020;21:1-  
18 10.  
19
- 20 7. Fernando AT, Arroll B, Considine NS. Enhancing compassion in general practice: it's not all about the  
21 doctor. *BJGP*; 2016.  
22
- 23 8. Sepucha KR, Simmons LH, Barry MJ, Edgman-Levitan S, Licurse AM, Chaguturu SK. Ten years, forty  
24 decision aids, and thousands of patient uses: shared decision making at Massachusetts General Hospital.  
25 *Health Aff*. 2016;35(4):630-6.  
26
- 27 9. Rashid A. Choosing Together: encouraging person centred care and shared decision making. *BMJ (Clinical  
28 research ed)*. 2015;350.  
29
- 30 10. Barry MJ, Edgman-Levitan S. Shared decision making—The pinnacle patient-centered care. *Apa  
31 PsycNET*. 2012.  
32
- 33 11. Plsek P. *Crossing the Quality Chasm: A New Health System for the 21st Century: The national academies  
34 of medicine*; 2001.  
35
- 36 12. Montori VM, Kunneman M, Brito JP. Shared decision making and improving health care: the answer is  
37 not in. *Jama*. 2017;318(7):617-8.  
38
- 39 13. Butterworth J, Hays R, McDonagh S, Bower P, Pitchforth E, Richards S, et al. Involving older people with  
40 multimorbidity in decision-making about their primary healthcare: A Cochrane systematic review of  
41 interventions (abridged). *Patient Educ Couns*. 2020.  
42
- 43 14. Elwyn G, Frosch DL, Kobrin S. Implementing shared decision-making: consider all the consequences.  
44 *Implement Sci*. 2015;11(1):114.  
45
- 46 15. Guyatt G, Oxman AD, Akl EA, Kunz R, Vist G, Brozek J, et al. GRADE guidelines: 1. Introduction-GRADE  
47 evidence profiles and summary of findings tables. *Journal of clinical epidemiology*. 2011;64(4):383-94.  
48  
49  
50  
51  
52  
53  
54  
55  
56  
57  
58  
59  
60

1  
2  
3  
4  
5  
6  
7  
8  
9  
10  
11  
12  
13  
14  
15  
16  
17  
18  
19  
20  
21  
22  
23  
24  
25  
26  
27  
28  
29  
30  
31  
32  
33  
34  
35  
36  
37  
38  
39  
40  
41  
42  
43  
44  
45  
46  
47  
48  
49  
50  
51  
52  
53  
54  
55  
56  
57  
58  
59  
60

16. Sterne JA, Hernán MA, Reeves BC, Savović J, Berkman ND, Viswanathan M, et al. ROBINS-I: a tool for assessing risk of bias in non-randomised studies of interventions. *BMJ (Clinical research ed)*. 2016;355:i4919.
17. Higgins JP, Altman DG, Gøtzsche PC, Jüni P, Moher D, Oxman AD, et al. The Cochrane Collaboration's tool for assessing risk of bias in randomised trials. *BMJ (Clinical research ed)*. 2011;343:d5928.
18. Tinsel I, Buchholz A, Vach W, Siegel A, Dürk T, Buchholz A, et al. Shared decision-making in antihypertensive therapy: a cluster randomised controlled trial. *BMC family practice*. 2013;14(1):135.
19. Shively MJ, Gardetto NJ, Kodiath MF, Kelly A, Smith TL, Stepnowsky C, et al. Effect of patient activation on self-management in patients with heart failure. *J Cardiovasc Nurs*. 2013;28(1):20-34.
20. Salisbury C, Man M-S, Bower P, Guthrie B, Chaplin K, Gaunt DM, et al. Management of multimorbidity using a patient-centred care model: a pragmatic cluster-randomised trial of the 3D approach. *Lancet Glob Health*. 2018;392(10141):41-50.
21. Hochhalter AK, Song J, Rush J, Sklar L, Stevens A. Making the most of your healthcare intervention for older adults with multiple chronic illnesses. *Patient Educ Couns*. 2010;81(2):207-13.
22. Tay FHE, Thompson CL, Nieh CM, Nieh CC, Koh HM, Tan JJC, et al. Person-centered care for older people with dementia in the acute hospital. *Alzheimers Dement (N Y)*. 2018;4:19-27.
23. Wong CK, Wong WC, Lam CL, Wan Y, Wong WH, Chung K, et al. Effects of Patient Empowerment Programme (PEP) on clinical outcomes and health service utilization in type 2 diabetes mellitus in primary care: an observational matched cohort study. *PloS one*. 2014;9(5):e95328.
24. Ulin K, Olsson L-E, Wolf A, Ekman I. Person-centred care—An approach that improves the discharge process. *Eur J Cardiovasc Nurs*. 2016;15(3):e19-e26.
25. Naik AD, Hundt NE, Vaughan EM, Petersen NJ, Zeno D, Kunik ME, et al. Effect of Telephone-Delivered Collaborative Goal Setting and Behavioral Activation vs Enhanced Usual Care for Depression Among Adults With Uncontrolled Diabetes: A Randomized Clinical Trial. *JAMA network open*. 2019;2(8):e198634.
26. Reed RL, Roeger L, Howard S, Oliver-Baxter JM, Battersby MW, Bond M, et al. A self-management support program for older Australians with multiple chronic conditions: a randomised controlled trial. *Med J Aust*. 2018;208(2):69-74.
27. Willadsen TG, Siersma V, Nielsen ABS, Køster-Rasmussen R, Guassora AD, Jarbøl DE, et al. The effect of structured personal care on diabetes symptoms and self-rated health over 14 years after diabetes diagnosis. *Prim Care Diabetes*. 2018;12(4):354-63.

Figure 1: Flowchart

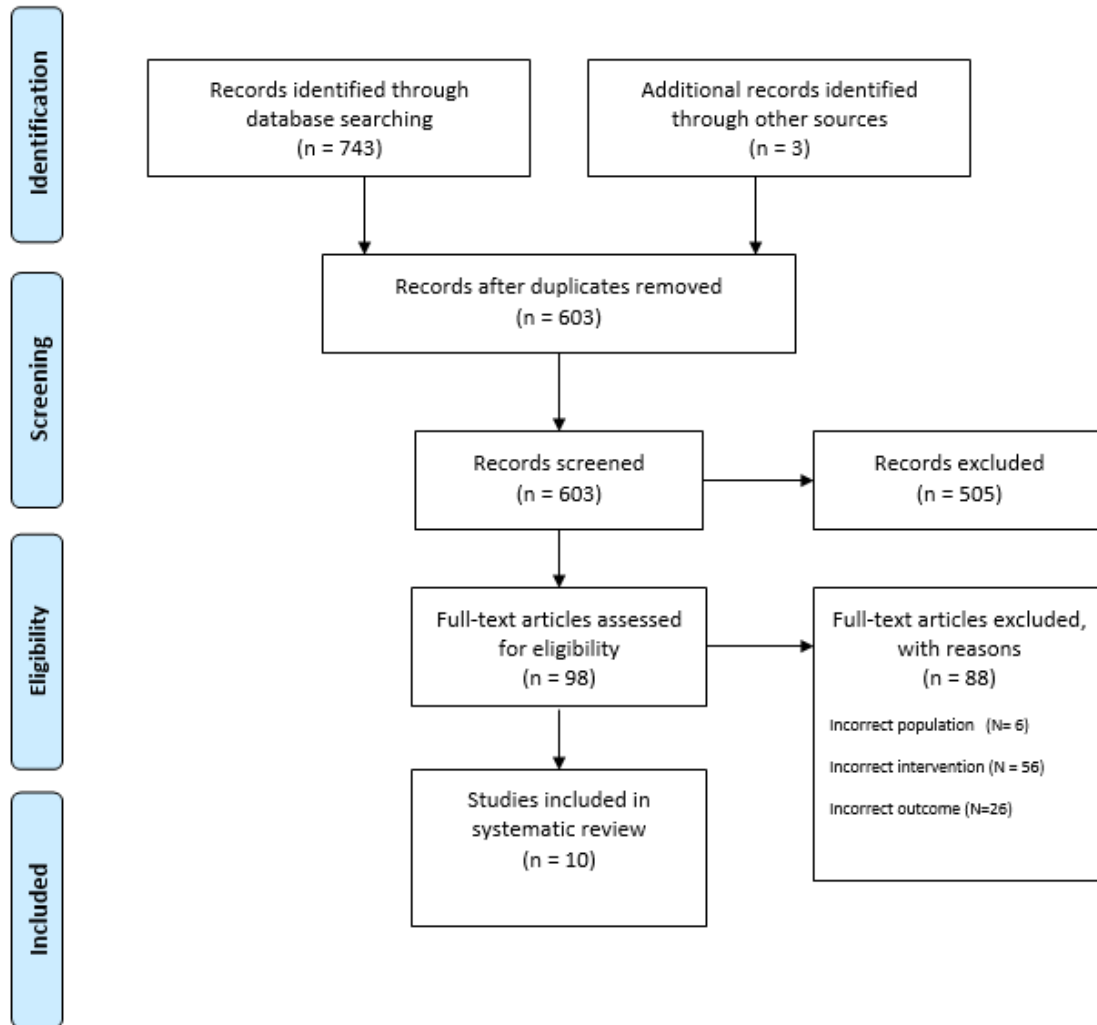

Figure 2: Total GRADE

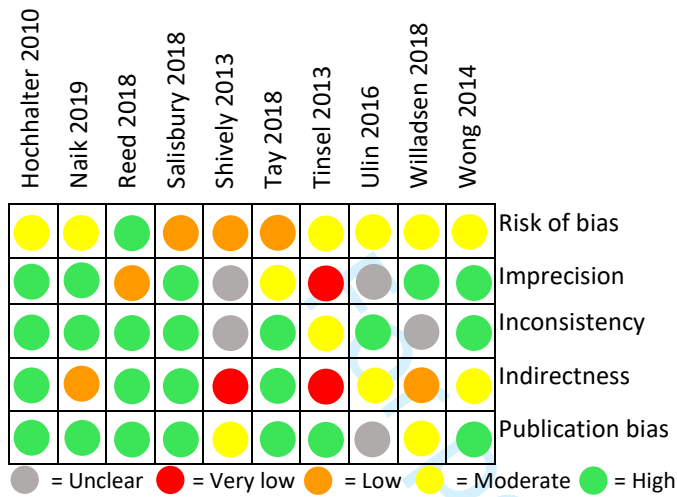

Peer review only

Figure 3: Risk of bias for randomised studies

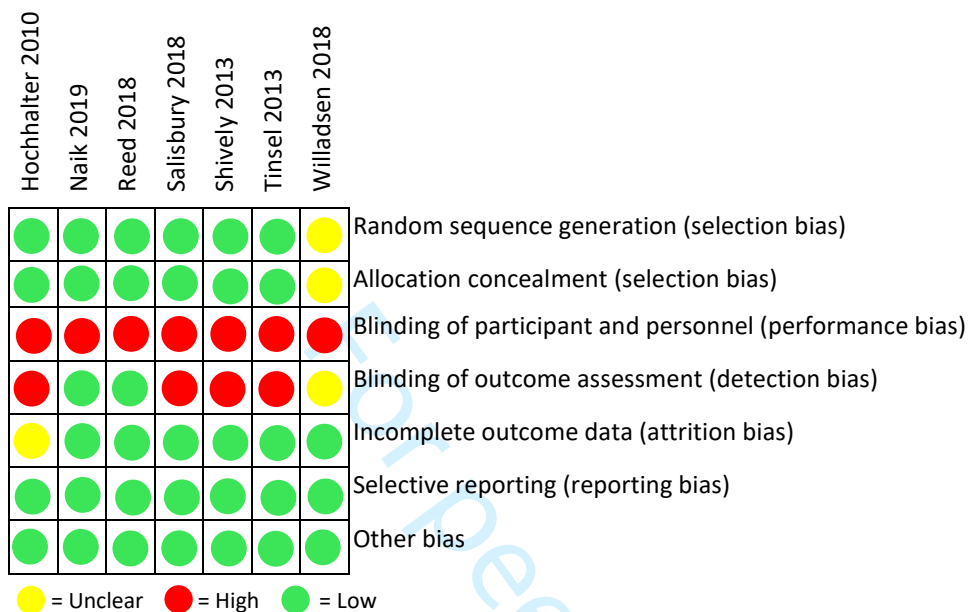



Figure 4: Risk of bias for non-randomised studies

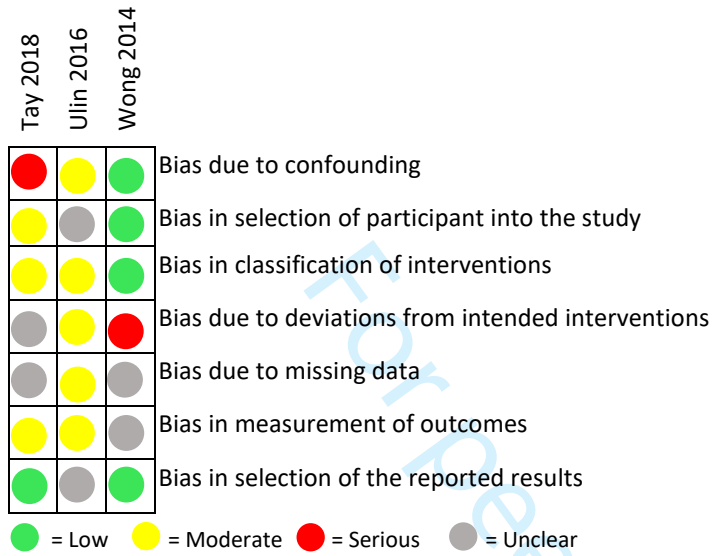

Appendix 1: Keywords

| <b>Aspect 1:</b>                | <b>AND</b> | <b>Aspect 2:</b>                      | <b>AND</b> | <b>Aspect:</b> |
|---------------------------------|------------|---------------------------------------|------------|----------------|
| Patient engagement              |            | Multimorbidity                        |            | Elderly        |
| Person-centered care            |            | Multimorbidity (MeSH)                 |            | Aged (MeSH)    |
| OR                              |            | OR                                    |            | OR             |
| Person centered care            |            | Multi-morbidity                       |            | Aged           |
| OR                              |            | OR                                    |            | OR             |
| Patient engagement              |            | Multimorbidity                        |            | Elderly        |
| OR                              |            | OR                                    |            | OR             |
| Patient empowerment             |            | Multi-morbidities                     |            | Older adult    |
| OR                              |            | OR                                    |            | OR             |
| Patient involvement             |            | Multi morbidities                     |            | Older adults   |
| OR                              |            | OR                                    |            |                |
| Patient participation<br>(MeSH) |            | Comorbidity (MeSH)                    |            |                |
|                                 |            | OR                                    |            |                |
|                                 |            | Comorbidity                           |            |                |
|                                 |            | OR                                    |            |                |
|                                 |            | Co-morbidity                          |            |                |
|                                 |            | OR                                    |            |                |
|                                 |            | Comorbidities                         |            |                |
|                                 |            | OR                                    |            |                |
|                                 |            | Co-morbidities                        |            |                |
|                                 |            | OR                                    |            |                |
|                                 |            | Multiple chronic<br>conditions (MeSH) |            |                |

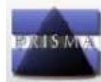

# PRISMA 2009 Checklist

1  
2  
3  
4  
5  
6  
7  
8  
9  
10  
11  
12  
13  
14  
15  
16  
17  
18  
19  
20  
21  
22  
23  
24  
25  
26  
27  
28  
29  
30  
31  
32  
33  
34  
35  
36  
37  
38  
39  
40  
41  
42  
43  
44  
45  
46  
47

| Section/topic                      | #  | Checklist item                                                                                                                                                                                                                                                                                              | Reported on page # |
|------------------------------------|----|-------------------------------------------------------------------------------------------------------------------------------------------------------------------------------------------------------------------------------------------------------------------------------------------------------------|--------------------|
| <b>TITLE</b>                       |    |                                                                                                                                                                                                                                                                                                             |                    |
| Title                              | 1  | Identify the report as a systematic review, meta-analysis, or both.                                                                                                                                                                                                                                         | 1                  |
| <b>ABSTRACT</b>                    |    |                                                                                                                                                                                                                                                                                                             |                    |
| Structured summary                 | 2  | Provide a structured summary including, as applicable: background; objectives; data sources; study eligibility criteria, participants, and interventions; study appraisal and synthesis methods; results; limitations; conclusions and implications of key findings; systematic review registration number. | 2                  |
| <b>INTRODUCTION</b>                |    |                                                                                                                                                                                                                                                                                                             |                    |
| Rationale                          | 3  | Describe the rationale for the review in the context of what is already known.                                                                                                                                                                                                                              | 3                  |
| Objectives                         | 4  | Provide an explicit statement of questions being addressed with reference to participants, interventions, comparisons, outcomes, and study design (PICOS).                                                                                                                                                  | 5                  |
| <b>METHODS</b>                     |    |                                                                                                                                                                                                                                                                                                             |                    |
| Protocol and registration          | 5  | Indicate if a review protocol exists, if and where it can be accessed (e.g., Web address), and, if available, provide registration information including registration number.                                                                                                                               |                    |
| Eligibility criteria               | 6  | Specify study characteristics (e.g., PICOS, length of follow-up) and report characteristics (e.g., years considered, language, publication status) used as criteria for eligibility, giving rationale.                                                                                                      | 6-10               |
| Information sources                | 7  | Describe all information sources (e.g., databases with dates of coverage, contact with study authors to identify additional studies) in the search and date last searched.                                                                                                                                  | 5                  |
| Search                             | 8  | Present full electronic search strategy for at least one database, including any limits used, such that it could be repeated.                                                                                                                                                                               | Appendix 1         |
| Study selection                    | 9  | State the process for selecting studies (i.e., screening, eligibility, included in systematic review, and, if applicable, included in the meta-analysis).                                                                                                                                                   | 5                  |
| Data collection process            | 10 | Describe method of data extraction from reports (e.g., piloted forms, independently, in duplicate) and any processes for obtaining and confirming data from investigators.                                                                                                                                  | 5                  |
| Data items                         | 11 | List and define all variables for which data were sought (e.g., PICOS, funding sources) and any assumptions and simplifications made.                                                                                                                                                                       | 5                  |
| Risk of bias in individual studies | 12 | Describe methods used for assessing risk of bias of individual studies (including specification of whether this was done at the study or outcome level), and how this information is to be used in any data synthesis.                                                                                      | 6                  |
| Summary measures                   | 13 | State the principal summary measures (e.g., risk ratio, difference in means).                                                                                                                                                                                                                               |                    |
| Synthesis of results               | 14 | Describe the methods of handling data and combining results of studies, if done, including measures of consistency (e.g., I <sup>2</sup> ) for each meta-analysis.                                                                                                                                          |                    |

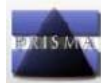

# PRISMA 2009 Checklist

Page 1 of 2

| Section/topic                 | #  | Checklist item                                                                                                                                                                                           | Reported on page # |
|-------------------------------|----|----------------------------------------------------------------------------------------------------------------------------------------------------------------------------------------------------------|--------------------|
| Risk of bias across studies   | 15 | Specify any assessment of risk of bias that may affect the cumulative evidence (e.g., publication bias, selective reporting within studies).                                                             | 6, 10              |
| Additional analyses           | 16 | Describe methods of additional analyses (e.g., sensitivity or subgroup analyses, meta-regression), if done, indicating which were pre-specified.                                                         |                    |
| <b>RESULTS</b>                |    |                                                                                                                                                                                                          |                    |
| Study selection               | 17 | Give numbers of studies screened, assessed for eligibility, and included in the review, with reasons for exclusions at each stage, ideally with a flow diagram.                                          | 6, Figure 1        |
| Study characteristics         | 18 | For each study, present characteristics for which data were extracted (e.g., study size, PICOS, follow-up period) and provide the citations.                                                             | 6-10               |
| Risk of bias within studies   | 19 | Present data on risk of bias of each study and, if available, any outcome level assessment (see item 12).                                                                                                | 10                 |
| Results of individual studies | 20 | For all outcomes considered (benefits or harms), present, for each study: (a) simple summary data for each intervention group (b) effect estimates and confidence intervals, ideally with a forest plot. | 11-14              |
| Synthesis of results          | 21 | Present results of each meta-analysis done, including confidence intervals and measures of consistency.                                                                                                  |                    |
| Risk of bias across studies   | 22 | Present results of any assessment of risk of bias across studies (see Item 15).                                                                                                                          | Figure 3 and 4     |
| Additional analysis           | 23 | Give results of additional analyses, if done (e.g., sensitivity or subgroup analyses, meta-regression [see Item 16]).                                                                                    |                    |
| <b>DISCUSSION</b>             |    |                                                                                                                                                                                                          |                    |
| Summary of evidence           | 24 | Summarize the main findings including the strength of evidence for each main outcome; consider their relevance to key groups (e.g., healthcare providers, users, and policy makers).                     | 14-15              |
| Limitations                   | 25 | Discuss limitations at study and outcome level (e.g., risk of bias), and at review-level (e.g., incomplete retrieval of identified research, reporting bias).                                            | 15                 |
| Conclusions                   | 26 | Provide a general interpretation of the results in the context of other evidence, and implications for future research.                                                                                  | 15-16              |
| <b>FUNDING</b>                |    |                                                                                                                                                                                                          |                    |
| Funding                       | 27 | Describe sources of funding for the systematic review and other support (e.g., supply of data); role of funders for the systematic review.                                                               | 16                 |

From: Moher D, Liberati A, Tetzlaff J, Altman DG, The PRISMA Group (2009). Preferred Reporting Items for Systematic Reviews and Meta-Analyses: The PRISMA Statement. PLoS Med 6(7): e1000097. doi:10.1371/journal.pmed1000097

For more information, visit: [www.prisma-statement.org](http://www.prisma-statement.org).

For peer review only - <http://bmjopen.bmj.com/site/about/guidelines.xhtml>

# BMJ Open

## Systematic review of patient-engagement interventions: potentials for enhancing person-centred care for older patients with multi-morbidity

|                                 |                                                                                                                                                                                                                                                                               |
|---------------------------------|-------------------------------------------------------------------------------------------------------------------------------------------------------------------------------------------------------------------------------------------------------------------------------|
| Journal:                        | <i>BMJ Open</i>                                                                                                                                                                                                                                                               |
| Manuscript ID                   | bmjopen-2020-048558.R1                                                                                                                                                                                                                                                        |
| Article Type:                   | Original research                                                                                                                                                                                                                                                             |
| Date Submitted by the Author:   | 07-Sep-2021                                                                                                                                                                                                                                                                   |
| Complete List of Authors:       | Søgaard, Mathilde Bendix; University of Copenhagen Faculty of Health and Medical Sciences, Center of Healthy Aging & Department of Public Health<br>Andresen, Katrine; University of Copenhagen,<br>Kristiansen, Maria; University of Copenhagen, Department of Public Health |
| <b>Primary Subject Heading</b>: | Patient-centred medicine                                                                                                                                                                                                                                                      |
| Secondary Subject Heading:      | Health services research                                                                                                                                                                                                                                                      |
| Keywords:                       | PUBLIC HEALTH, GERIATRIC MEDICINE, Quality in health care < HEALTH SERVICES ADMINISTRATION & MANAGEMENT                                                                                                                                                                       |
|                                 |                                                                                                                                                                                                                                                                               |

SCHOLARONE™  
Manuscripts

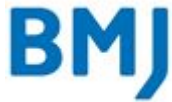

I, the Submitting Author has the right to grant and does grant on behalf of all authors of the Work (as defined in the below author licence), an exclusive licence and/or a non-exclusive licence for contributions from authors who are: i) UK Crown employees; ii) where BMJ has agreed a CC-BY licence shall apply, and/or iii) in accordance with the terms applicable for US Federal Government officers or employees acting as part of their official duties; on a worldwide, perpetual, irrevocable, royalty-free basis to BMJ Publishing Group Ltd ("BMJ") its licensees and where the relevant Journal is co-owned by BMJ to the co-owners of the Journal, to publish the Work in this journal and any other BMJ products and to exploit all rights, as set out in our [licence](#).

The Submitting Author accepts and understands that any supply made under these terms is made by BMJ to the Submitting Author unless you are acting as an employee on behalf of your employer or a postgraduate student of an affiliated institution which is paying any applicable article publishing charge ("APC") for Open Access articles. Where the Submitting Author wishes to make the Work available on an Open Access basis (and intends to pay the relevant APC), the terms of reuse of such Open Access shall be governed by a Creative Commons licence – details of these licences and which [Creative Commons](#) licence will apply to this Work are set out in our licence referred to above.

Other than as permitted in any relevant BMJ Author's Self Archiving Policies, I confirm this Work has not been accepted for publication elsewhere, is not being considered for publication elsewhere and does not duplicate material already published. I confirm all authors consent to publication of this Work and authorise the granting of this licence.

1  
2  
3  
4 **Systematic review of patient-engagement interventions: potentials for enhancing person-centred care**  
5 **for older patients with multi-morbidity**  
6  
7

8 Mathilde Bendix Sjøgaard, MSc Public Health, Consultant, mbs02@live.dk, +4526791119, Center for Healthy  
9 Aging & Department of Public Health, Faculty of Health and Medical Sciences, University of Copenhagen,  
10 Øster Farimagsgade 5, 1014 Copenhagen K, Denmark  
11  
12  
13

14  
15 Katrine Andresen, MSc Public Health, Clinical research coordinator, k\_andresen95@hotmail.com,  
16 +4560388971, Center for Healthy Aging & Department of Public Health, Faculty of Health and Medical  
17 Sciences, University of Copenhagen, Øster Farimagsgade 5, 1014 Copenhagen K, Denmark  
18  
19  
20

21  
22 Maria Kristiansen\*, PhD Public Health, Associate professor, [makk@sund.ku.dk](mailto:makk@sund.ku.dk), +4535334805, Center for  
23 Healthy Aging & Department of Public Health, Faculty of Health and Medical Sciences, University of  
24 Copenhagen, Øster Farimagsgade 5, 1014 Copenhagen K, Denmark  
25  
26  
27

28 \* Corresponding author  
29  
30

31  
32 KEYWORDS: PUBLIC HEALTH, GERIATRIC MEDICINE, QUALITY IN HEALTH CARE  
33  
34

35  
36 Word count: 4250 words  
37  
38  
39  
40  
41  
42  
43  
44  
45  
46  
47  
48  
49  
50  
51  
52  
53  
54  
55  
56  
57  
58  
59  
60

1  
2  
3  
4  
5  
6  
7  
8  
9  
10  
11  
12  
13  
14  
15  
16  
17  
18  
19  
20  
21  
22  
23  
24  
25  
26  
27  
28  
29  
30  
31  
32  
33  
34  
35  
36  
37  
38  
39  
40  
41  
42  
43  
44  
45  
46  
47  
48  
49  
50  
51  
52  
53  
54  
55  
56  
57  
58  
59  
60**ABSTRACT**

**Introduction:** Person-centred care based on systematic and comprehensive patient-engagement is gaining momentum across healthcare systems. Providing care that is responsive to the needs, values and priorities of each patient is important for patients, relatives, and providers alike, not least for the growing population of older patients living with multi-morbidity and associated complex care trajectories.

**Objectives:** The aim of this systematic review is to investigate the effects of patient engagement interventions for older patients with multi-morbidity.

**Methods:** Systematic review conducted in August 2021. Two reviewers independently screened the international databases Embase and PubMed. Reviewers carried out duplicate and independent data extraction and assessment of study quality. GRADE (Grading of Recommendations Assessment, Development, and Evaluation) was used to assess the quality of the evidence for each study.

**Results:** We included twelve studies from primary care setting and hospitals. The included studies were heterogeneous in terms of characteristics of populations, types of interventions to enhance patient-engagement, outcome measures and length of follow-up. Nine of the twelve included studies found significant improvements in health and patient-reported-outcomes such as higher quality adjusted life years, fewer hospital visits and disease specific symptoms. Quality of the included studies was of low to moderate.

**Conclusion:** This review identifies potential beneficial effects of interventions to enhance patient-engagement in older adults with multi-morbidity. Nevertheless, the limited and very diverse evidence-base calls for more robust studies into efficient approaches to engaging older adults with multi-morbidity in care trajectories.



## ARTICLE SUMMARY

### Strengths and limitations of this study

- This systematic review explores the understudied field of interventions to enhance patient-engagement in the growing population of older adults with multi-morbidity
- Included studies are not limited to specific health-and patient-reported outcomes in order to capture the broad effectiveness of these interventions
- Meta-analysis was not possible due to heterogeneity in methods and outcomes
- Quality of the included studies was low to moderate overall, hence there is a need for more robust studies using a range of outcomes to identify best practices in patient-engagement in the context of multi-morbidity in old age.

## INTRODUCTION

Person-centred care is defined as care that is based on elicitation of and responsiveness to the individual patient's needs, values, resources and life situation.[1] In increasingly complex and prolonged treatment trajectories, engaging older patients in a timely, systematic and holistic manner may improve experiences and outcomes for patients and relatives, and enhance meaningfulness among healthcare professionals. Furthermore, it may support adequate use of scarce healthcare resources as treatment plans are tailored to individual needs, potentially improving engagement of more disadvantaged patients and ultimately decreasing social inequality in healthcare utilization.[2, 3]

Identifying the best care trajectory in the light of the uniqueness of each patient's circumstances is particularly important for the growing population of older patients living with multi-morbidity, defined as patients living with two or more co-existing long term conditions,[4] and associated polypharmacy requiring prolonged and complex care trajectories across care settings.[5-7] In the context of population ageing and increased multi-morbidity, more systematically and timely offered conversations with patients related to future scenarios and priorities is crucial. This includes a range of complex decisions on prognosis, treatment options and prioritizing care at the end of life driven by patient perspectives on what is acceptable and meaningful to him/her. Person-centred care requires empowered patients who are met by a responsive and accessible hospital with a culture of engagement, sufficient time, and a skill-set that nurtures daily practices based on unlocking patient perspectives and delivering coherent care to reflect these.[3, 8, 9] While there is overall agreement concerning the importance of person-centred care, there is little scientific evidence documenting significant outcomes of patient engagement regarding patient satisfaction, enhanced shared decision-making, adjustment of treatment plans, or use of resources.[10-14] A recent systematic review[15] aimed at assessing the effect of the interventions for older patients with multi-morbidity aiming to involve them in decision-making in primary care consultations found too limited evidence to interpret with certainty. The systematic review included only randomised-controlled trial's (RCT) in primary health care. To investigate this topic further we included both RCTs and non-randomised studies in primary and secondary health care setting. More focus on patient-engagement tools as interventions to enhance person-centred care in clinical encounters is needed for providing a more substantive evidence base to guide prioritization and implementation into mainstream healthcare delivery.[16] The aim of the systematic review is to investigate the current evidence for effectiveness of patient-engagement tools in enhancing person-centred care for older adults (60+ year) with more than one disease.

## METHODS

### Literature search and study selection

The review is based on systematic literature searches conducted in August 2021 using the databases PubMed and Embase. Furthermore, reference lists of included articles were assessed to identify additional peer-reviewed articles. The complete list of search terms, including MESH terms and free text terms, is presented in Appendix 1.

The software DistillerSR was used to screen and review the studies. Data were independently extracted onto a customised data extraction sheet in DistillerSR by two reviewers, and any discrepancies were resolved by discussion.

The eligibility criteria for study inclusion were as follows:

- Population: Older adults above the age of 60 living with two or more co-existing diseases.
- Intervention: Patient engagement intervention in health care system settings.
- Comparison groups: Older patients who received usual care.
- Outcome: Any patient-related outcome e.g. reduced symptoms of disease, reduced duration of disease, reduced costs and reduced hospital stay or rehospitalisation.

We included quantitative observational studies such as prospective and retrospective cohort studies and RCTs. Studies in any geographical area in health care systems, thus encompassing both primary and secondary care settings, were included, and only studies written in English and in one of the Scandinavian languages (Danish, Swedish or Norwegian) were included.

Two investigators independently screened the titles, abstracts and full texts for inclusion and exclusion criteria. We excluded commentaries, editorials and studies that did not directly apply a patient-engagement intervention as an exposure. We did not exclude studies based on publication date.

First, the titles of the 805 studies were screened for eligibility. Secondly, duplicates were removed. Third, the abstracts of the studies were screened. Fourth, the full texts of studies initially assessed as relevant for the review were checked against our inclusion or exclusion criteria. Disagreements between the two investigators were resolved by consensus. Figure 1 shows reasons for exclusion for potentially eligible studies.

### Data extraction

Two investigators independently extracted information on characteristics of participants, study design, patient engagement intervention and outcomes. Discrepancies in data extraction were resolved by consensus between the two investigators.

1  
2  
3  
4  
5  
6  
7  
8  
9  
10  
11  
12  
13  
14  
15  
16  
17  
18  
19  
20  
21  
22  
23  
24  
25  
26  
27  
28  
29  
30  
31  
32  
33  
34  
35  
36  
37  
38  
39  
40  
41  
42  
43  
44  
45  
46  
47  
48  
49  
50  
51  
52  
53  
54  
55  
56  
57  
58  
59  
60

### **Quality assessment**

The included studies encompassed a combination of RCT and observational studies. To assess the quality of evidence, we used GRADE (Grading of Recommendations, Assessment, Development, and Evaluation) for all the included studies. GRADE is a transparency framework and is the most widely adopted tool for grading the quality of evidence. The checklist assesses quality of the study across eight domains. The evidence level can be rated down or up depending on missing or existing domains. GRADE certainty ratings have four levels as follows: very low, low, moderate, high. Very low means that the true effect is probably markedly different from the estimated effect. High means that the authors have a lot of confidence that the true effect of is similar to the estimated effect,[17]. To assess the domain risk of bias within GRADE we used two different measures depending on whether the study was randomised or non-randomised. In non-randomised studies we used ROBINS-I to assess risk of bias, which is a tool to understand and appraise strengths and weaknesses in non-randomised studies.[18] In RCTs we used Cochrane Collaboration's tool for assessing risk of bias.[19] Two investigators independently performed a quality assessment of each study. Disagreements were resolved by consensus.

### **Patient and Public Involvement Statement**

Patients were not involved in this systematic review.

## **RESULTS**

### **Description of included studies**

Figure 1 shows the PRISMA diagram in the phases from the 805 studies that were identified to the twelve studies that met the inclusion criteria. The main reason for exclusion were due to lack of specific interventions. Table 1 depicts the characteristics of the twelve included studies. The included studies were mainly RCT studies.

Table 1: Study characteristics of included studies

| Study                          | Location             | Design                      | Participants                                                                                                                                               | Multi-morbidity                                                                                                                                                    | Intervention                                                                                                                                   | Setting                                                            | Endpoint                                                                                                                                                                                     |
|--------------------------------|----------------------|-----------------------------|------------------------------------------------------------------------------------------------------------------------------------------------------------|--------------------------------------------------------------------------------------------------------------------------------------------------------------------|------------------------------------------------------------------------------------------------------------------------------------------------|--------------------------------------------------------------------|----------------------------------------------------------------------------------------------------------------------------------------------------------------------------------------------|
| <b>Hochhalter et al., 2010</b> | USA                  | Randomised Controlled Trial | 26 patients in appointment group, 27 in safety group, and 26 in usual group.<br>Mean age 76 in appointment group, 73 in safety group and 73 in usual group | At least two of the following chronic illnesses: arthritis, lung disease, heart disease, diabetes, hypertension, depression, or osteoporosis                       | Patient engagement, patient group workshop and individual coaching intervention                                                                | Primary care clinics, Scott & White Center for Diagnostic Medicine | PAM-13, Communication with physician's scale, HRQOL-14                                                                                                                                       |
| <b>Mateo-Abad et al. 2020</b>  | Spain                | Quasi-experimental study    | 101 patients in the intervention group and 99 patients in the usual care group.<br>Mean age 79                                                             | A minimum of two chronic diseases, with at least one of them being chronic obstructive pulmonary disease (COPD), diabetes mellitus, or chronic heart failure (CHF) | Care coordination and communication between health providers and patient empowerment and home-based care; all supported by ICT-based platforms | Integrated care organisations                                      | Use of services, clinical variables (such as BMI, blood pressure, heart rate, blood glucose), Geriatric depression scale (GDS), Functional status (Barthel Index)                            |
| <b>Naik et al. 2019</b>        | USA                  | Randomised Controlled Trial | 136 in the intervention group, and 89 in control group.<br>Mean age 61                                                                                     | Uncontrolled diabetes and depression                                                                                                                               | Proactive population screening and telephone delivery of a collaborative goal-setting intervention                                             | Veterans Affairs Medical Center                                    | Change in depression symptoms using PHQ-9 and HbA1c                                                                                                                                          |
| <b>Reed et al., 2018</b>       | Australia            | Randomised controlled trial | 114 in the intervention group, and 117 in the control group.<br>Age range: 60+                                                                             | At least two chronic diseases                                                                                                                                      | Self-management support program for older with multiple chronic conditions                                                                     | General practices                                                  | Self-rated health                                                                                                                                                                            |
| <b>Salisbury et al., 2018</b>  | England and Scotland | Cluster-randomised trial    | 797 patients in the intervention group, and 759 in the usual care group. Mean age 71 in intervention group and 70.7 in the usual care group                | At least three types of chronic conditions                                                                                                                         | Patient-centered strategies for management of multi-morbidity, 3D intervention                                                                 | General practices                                                  | Eq-5d-5l                                                                                                                                                                                     |
| <b>Schwarze et al. 2020</b>    | USA                  | Randomised controlled trial | 223 patients in the intervention group, and 223 patients in the usual care group.<br>Mean age 71 in intervention group and 72.6 in usual care group        | At least one comorbidity and an oncologic or vascular problem                                                                                                      | Question prompt list brochure targeting informational needs of patients considering major surgery                                              | Surgeons' clinics                                                  | Number of questions asked by patients and family during the recorded visit, Perceived Efficacy in Patient-Physician Interactions (PEPPI-5), Measure Yourself Concerns and Well-being (MYCaW) |

| Study                        | Location  | Design                                        | Participants                                                                                                                                  | Multi-morbidity                                                                                                                                                      | Intervention                                                                            | Setting                                                                       | Endpoint                                                                                                                                                                                                |
|------------------------------|-----------|-----------------------------------------------|-----------------------------------------------------------------------------------------------------------------------------------------------|----------------------------------------------------------------------------------------------------------------------------------------------------------------------|-----------------------------------------------------------------------------------------|-------------------------------------------------------------------------------|---------------------------------------------------------------------------------------------------------------------------------------------------------------------------------------------------------|
| <b>Shively et al. 2013</b>   | USA       | Randomised, 2-group, repeated-measures design | 43 patients in the Intervention group, and 41 in the group with usual care. Mean age 66,1 years                                               | Heart failure and comorbidities                                                                                                                                      | Patient activation intervention compared with usual care in patients with Heart failure | Veterans Affairs San Diego Healthcare System                                  | Patient Activation Measure, (PAM), Self-Care of Heart Failure Index (SCHIF), Medical Outcomes Study (MOS)                                                                                               |
| <b>Tay et al. 2018</b>       | Singapore | Prospective cohort study                      | 170 in the intervention group and 60 in the control group. Mean age in the intervention group is 82 years and 84 years in control group       | Dementia and comorbidities                                                                                                                                           | Person-centered care in Care for Acute Mentally Infirm Elders (CAMIE)                   | Hospital                                                                      | Well-being (WB)<br>Ill-being (IB)<br>Pittsburg Agitation Scale (PAS)<br>Modified Barthel Index (MBI)<br>EQ-5D Index Score                                                                               |
| <b>Tinsel et al. 2013</b>    | Germany   | Cluster Randomised Controlled Trial           | 552 patients in the intervention group, and 568 in the control group. Mean age 63,8 in intervention group and 65 in control group             | Hypertension and at least one relevant comorbid disorder (diabetes mellitus, coronary heart disease, heart attack, stroke, or peripheral arterial occlusive disease) | Shared decision-making in General practice with patients with uncontrolled hypertension | General practice                                                              | SDM-Q-9, systolic blood pressure                                                                                                                                                                        |
| <b>Ulin et al. 2016</b>      | Sweden    | Controlled before-and-after design            | 125 patients in the intervention group, and 123 in control group. Mean age range: 77-80                                                       | Chronic heart failure and comorbidities                                                                                                                              | Gothenburg Person-centered care (gPCC) in patients hospitalized                         | Department of Medicine at Sahlgrenska University Hospital/Östra in Gothenburg | Number of days from admission to<br>1. first notice to the municipality<br>2. second notice to the municipality<br>3. notice to the municipality that the patient was ready for discharge from hospital |
| <b>Wong et al. 2014</b>      | Hong Kong | Observational matched cohort study            | 1.141 in the intervention group and 1.141 in the control group. Mean age 64                                                                   | Type 2 diabetes mellitus and hypertension                                                                                                                            | Patient Empowerment Program in General Outpatient Clinics (GOPC)                        | General Outpatient Clinics (GOPC)                                             | HbA1c, Systolic blood pressure (SBP), Diastolic blood pressure (DBP), LDL-cholesterol                                                                                                                   |
| <b>Willadsen et al. 2018</b> | Denmark   | Randomised Controlled Trial                   | 970 patients in the intervention group and 539 in the group with usual care. Mean age 64,7 in intervention group and 64,5 in usual care group | Diabetes and multi-morbidity                                                                                                                                         | Structured personnel care in patients with diabetes                                     | General practice                                                              | Self-rated health, diabetes symptoms                                                                                                                                                                    |

1  
2  
3  
4  
5  
6  
7  
8  
9  
10  
11  
12  
13  
14  
15  
16  
17  
18  
19  
20  
21  
22  
23  
24  
25  
26  
27  
28  
29  
30  
31  
32  
33  
34  
35  
36  
37  
38  
39  
40  
41  
42  
43  
44  
45  
46

For peer review only

1  
2  
3  
4 The sample sizes of the twelve included studies ranged widely across studies (mean: 684 patients, range 79-  
5 2282). Five studies (42%) were conducted in the Europe, four (33%) in US, and three (25%) elsewhere. The  
6 most common study design was RCT (n=8; 67%) followed by Cohort/observational (n=3; 25%) and quasi-  
7 experimental design (n=1; 8%). Most studies were conducted in primary care setting (n=7; 58%). A total of  
8 five studies (42%) were conducted in general hospitals involving patients from a range of specialties. In the  
9 studies, the participants have many different diseases such as diabetes, chronic heart failure, dementia etc.  
10 The mean age in the studies was +60 years with a range: 60- 84 years, however, there were two studies  
11 that did not indicate the mean age but included an 18+ year population with most 60+ years. A wide range  
12 of multi-morbidities is represented in the included studies with some focusing more widely on engagement  
13 of patients with multiple coexisting diseases whereas others targeted specific diseases in patients with  
14 comorbidities.

15 The included studies used different patient engagement interventions, such as coaching, health care  
16 communication, goal setting interventions, self-management program, 3D intervention, prompt list, and  
17 disease-specific sessions. Different types of primary outcomes were used in studies such as Patient  
18 Activations Measurements (PAM), Self-Rated health (SRH), hospitalisation, use of health services, change in  
19 clinical outcomes (e.g. BMI, blood pressure, blood glucose), Modified Barthel Index (MBI), and quality of  
20 life. Disease specific outcomes such as blood pressure, Cholesterol level and blood glucose were used in  
21 some of the studies.

### 22 **Quality of included studies**

23 Figure 2 shows the quality assessment for each included study. Three studies were assessed to be of high  
24 quality in all domains apart from one, which was judged to be low or moderate. An additional five studies  
25 were assessed to be of high quality apart from two domains, which was judged to be low or moderate. The  
26 last four studies were only judged to be of high quality in one or none of the five domains.

27 Risk of bias for RCTs is shown in figure 3. All studies had high risk of bias due to blinding of participants and  
28 personnel (performance bias). Furthermore, four studies were rated to high risk of blinding of outcome  
29 assessment (detection bias).[20-23]

30 Figure 4 show risk of bias for non-randomised studies. Two studies were rated to have high risk of bias, and  
31 two studies were rated moderate risk of bias. One study had high risk of bias due to confounding,[24] and  
32 another study had high risk of bias due to deviations from intended intervention.[25] One study rated to  
33 moderate risk of bias had moderate risk of bias in five categories[26], and the other had moderate risk of  
34 bias in two categories [27].All four studies had unclear risk of bias in more than one category.



1  
2  
3  
4 In total, the quality of the included studies was of low to moderate and some aspects of quality assessment  
5 and risk of bias were unclear across the included studies.  
6  
7

### 8 **Effect of the interventions**

9

10 The included studies are using different endpoints to measure the effect of patient engagement  
11 interventions. Nine of the included studies found significant effect of interventions.  
12  
13

14 A RCT by Naik[28] measure the effect of the intervention Healthy Outcomes Through Patient  
15 Empowerment (HOPE) which is a six-months goal-setting intervention targeting depression symptoms and  
16 diabetes self-care through nine telephone-delivered coaching sessions. The HOPE intervention used an  
17 electronic data warehouse to identify specific high-risk population, followed by telephone screening and  
18 training of clinicians to deliver a structured telehealth intervention. The endpoints in this study was  
19 depression symptoms with The Patient Health Questionnaire (PHQ)-9 and glycaemic control with  
20 haemoglobin A1c (HbA1c). They did not find any improvement in six-month follow-up, but found  
21 improvement in PHQ-9 after 12-month follow-up; HOPE (Mean [SD] baseline: 15,8 [4,2] to six months: 10,9  
22 [6,1] and 12 months 10,1 [6,5] ) compared with Enhanced Usual Care (EUC) (Mean [SD] baseline 16,2 [4,0]  
23 to six months 12,4[6,0]) and 12 months 12,6 [6,0]. The PHQ-9 differences between HOPE and EUC were  
24 statistically significant at six months (mean diff., 1.74; 95% CI, 0.14-3.33; P = 0.03) and 12 months (mean  
25 diff., 2.14; 95% CI, 0.18-4.10; P = 0.03).  
26  
27  
28  
29  
30  
31  
32  
33  
34

35 The study by Reed[29] examined the effect of the intervention Chronic Disease Self-Management Support  
36 (CDSMS) which is a set of tools (Partners in Health scale, Cue and Response interview, Problems and Goals  
37 assessment) and a structured process that enable clinicians and patients to collaboratively assess self-  
38 management behaviour, identify problems, set goals, and develop individual care plans that address key  
39 self-care, medical, psychosocial, and care problems. Participants in each program received three home  
40 visits and four follow-up phone calls over a six-month period from a clinician. The population were  
41 recruited from five general practices in Adelaide, Australia. The study used self-rated health as endpoint,  
42 and they with an intention-to-treat analysis that CDSMS participants were more likely than control  
43 participants to report improved self-rated health at six months (R, 2.50; 95% confidence interval, 1.13-5.50;  
44 P = 0.02).  
45  
46  
47  
48  
49  
50  
51

52 A RCT by Shively[21] implemented a six month program developed to enhance self-management in older  
53 heart failure patients. The program consisted of individualized goal setting according to baseline activation  
54 level. The interventions population was invited to participate through a follow-up visit at the Veterans  
55 Affairs San Diego Healthcare system. The study used Patient Activation Measure (PAM), Self-Care of Heart  
56  
57  
58  
59  
60

1  
2  
3  
4 Failure Index (SCHFI), Medical Outcomes Study (MOS), and hospital visits to measure the effect of the  
5 intervention. The intervention showed improvement in PAM-score, the intervention group compared with  
6 the usual care group showed a significant increase in PAM-scores from baseline to six months (significant  
7 group by time interaction,  $F = 3.73$ ,  $P = 0.03$ ) and fewer hospital visits compared with usual group.  
8  
9

10  
11 A prospective naturalistic cohort study by Tay[24] examined the effect of the intervention Care for Acute  
12 Mentally Infirm Elders (CAMIE) which adopt a person-centred care protocol with specialized psychosocial  
13 interventions, minimally obtrusive medical care, and physical restraints-free practice targeting patients  
14 with dementia. The study population were recruited at a hospital, and all patients received standard  
15 treatment. Patients were admitted to the CAMIE unit if they suffered from confusion due to dementia,  
16 with/without delirium based on the confusion assessment method criteria, and concomitant acute medical  
17 problems. The study used Modified Barthel Index function and Well-being and European Quality of Life  
18 (EuroQol) to measure the CAMIE intervention. CAMIE patients showed statistically significant greater gains  
19 in Modified Barthel Index function (mean [SD] baseline 47.31 [28.90] to 55.58 [29.37]) and well-Being  
20 (mean [SD] baseline 4.94 [3.95] to 8.46 [3.49]), decreased ill-Being and agitation (mean [SD] baseline 3.04  
21 [2.11] to 0.84 [1.26]), and greater improvement in EuroQoL index score (mean [SD] baseline -0.16 [0.43] to  
22 0.15 [0.41]) after adjusting for baseline differences that translated to a quality-adjusted life years gain of  
23 0.045, assuming stability over three months.  
24  
25

26  
27 A controlled before-and-after design by Ulin et al[26] studied the effect of proactive care-planning based on  
28 Gothenburg Person-Centred Care (gPCC). It seeks to identify patient's resources including motivations and  
29 goals. This information is used to develop a health plan which includes planned investigations, length of  
30 stay in hospital and treatment goals. The health plan is discussed with the patient to reach consensus and  
31 the plan is regularly evaluated. The population were recruited from five designated wards at a University  
32 Hospital in Sweden. The patients were assessed by a specialised cardiologist before final inclusion, guided  
33 by the European Society of Cardiology (ESC) guidelines for diagnosing Congestive Heart Failure (CHF). The  
34 study used discharge destination and number of days until the discharge was recorded, to measure the  
35 gPCC intervention. They found improved discharge processes (1-5 days for gPCC group vs 1-28 days for  
36 control group), and fewer days in hospital (11 days for gPCC group vs 35 days for control group).  
37  
38

39  
40 A RCT by Willadsen[30] examined the effect of structured personal diabetes care with general practitioners  
41 (GPs) that ask GPs and patient to agree on the best possible goal for controlling risk factors. GPs were  
42 offered six seminars and were instructed to give advice lifestyle. Patients were invited to attend follow-up  
43 examination quarterly and screening for diabetes complications every year. The study used self-rated  
44 health and diabetes symptoms to measure the effect of the structured person care intervention. They  
45  
46  
47  
48  
49  
50  
51  
52  
53  
54  
55  
56  
57  
58  
59  
60

1  
2  
3  
4 found that the intervention reduced the diabetes symptoms (OR 0.79; 95% CI: 0.64–0.97), but they didn't  
5 find the same after 14 years follow-up.  
6  
7

8 An observational matched cohort study by Wong[25] implemented a Patient Empowerment Programme  
9 (PEP) that aims to provide patient with knowledge and skills about their disease Type 2 Diabetes (T2DM)  
10 and to facilitate autonomous self-regulation. The program consisted of generic sessions about self-efficacy  
11 enhancement and lifestyle modification as well as disease-specific sessions for a period of up to 12 months.  
12 Two non-government organisations (NGO) delivered the intervention, the NGO's invited at general  
13 outpatients' clinics or family medicine specialist eligible patients to join the PEP. The study used HbA1c,  
14 Systolic Blood Pressure (SBP), Diastolic Blood Pressure (DBP), and Low-Density Lipoprotein (LDL-C) to  
15 measure the effect of PEP. They found improvement in the clinical outcomes. A significantly greater  
16 percentage of patients in the PEP group attained HbA1C  $\leq 7\%$  or LDL-C  $\leq 2.6$  mmol/L at 12-month follow-up  
17 compared with the non-PEP group. PEP group had a mean 0.813 fewer General Outpatient Clinic (GOPC)  
18 visits in comparison with the non-PEP group.  
19  
20  
21  
22  
23  
24  
25  
26

27 A study by Hochhalter[23] measured the effect of Making the Most of Your Healthcare intervention which  
28 offered tools and taught skills to (a) prepare for healthcare appointments, (b) communicate effectively and  
29 gather information and support during healthcare appointments, and (c) follow through on plans of care.  
30 The intervention included a two-hour workshop and two telephone calls individualized to the patient's pre-  
31 and post-healthcare appointment needs. The included population were patients in a large Internal  
32 Medicine Clinic and had been treated for at least two of seven chronic illnesses. They found a statistically  
33 significant improvement in self-efficacy for the intervention group, who received a 2-hour workshop. They  
34 used PAM-13 and Health Related Quality of Life (HRQOL)-14 questionnaires as measurement. They found  
35 an improvement in Self-Efficacy in the Appointment group (mean [SD] baseline 6,9 [1,9] to 7,4 [1,8]) mean  
36 diff. 0,47 95%CI; 0,07-0,87 P = 0,021. They did not find any improvement in health for the control group or  
37 safety group.  
38  
39  
40  
41  
42  
43  
44  
45

46 A quasi-experimental study by Mateo-Abad [27] examined the impact of the CareWell integrated care  
47 model on use of health resources and clinical effectiveness. The program is based on coordination between  
48 health providers, patient empowerment and home-based care, supported by communication and  
49 information technology tools. Relevant differences were observed between the intervention and control  
50 group, including reduced numbers of hospitalisations and visits to emergency centres, and clinical  
51 outcomes in the intervention group. For instance, when hospitalised their hospital stay was longer for the  
52 control group; the mean number of days in the hospital was 13.3 (SD,13.5), whereas the mean stay for the  
53 intervention group was 10.4 (SD, 9) days.  
54  
55  
56  
57  
58  
59  
60

1  
2  
3  
4  
5  
6  
7  
8  
9  
10  
11  
12  
13  
14  
15  
16  
17  
18  
19  
20  
21  
22  
23  
24  
25  
26  
27  
28  
29  
30  
31  
32  
33  
34  
35  
36  
37  
38  
39  
40  
41  
42  
43  
44  
45  
46  
47  
48  
49  
50  
51  
52  
53  
54  
55  
56  
57  
58  
59  
60

Whereas the studies described above did show some improvements of patient-engagement interventions in multi-morbid older patients based on a range of outcomes, the following three studies did not find any significant improvements in health outcomes.

A pragmatic cluster-randomised trial by Salisbury[22] examined the effect of the so-called 3D intervention which is based on a patient-centred care model and seeks to improve continuity, coordination, and efficiency of care by replacing disease-focused reviews of each health condition with one 6-monthly comprehensive multidisciplinary review. Each 3D review consists of two appointments with a nurse and a named responsible physician and a records-based medication review by a pharmacist. The population were recruited from three general practices providing National Health Service (NHS) primary medical in England and Scotland. They measured quality of life with a 5Q-5D-5L questionnaire. The intention-to-treat analysis showed no difference between trial groups (adjusted difference in mean EQ-5D-5L 0.00, 95% CI -0.02 to 0.02;  $p=0.93$ ). They concluded the intervention did not improve the participant's quality of life.

The study by Tinsel[20] implemented a shared decision-making (SDM) training program that aims to enhance the active role of patients. The program included disease information, physician-patient communication, steps of SDM, motivational interviewing, decision table listing, and role plays simulating consultations. The GP's followed a SDM training programme, and the study population was conducted through GP's in southwest Germany. They used change of patients' perceived participation (SDM-Q-9) and change in systolic blood pressure (BP). According to the mixed model analysis, the average change from T0 was 3.11 points higher in the intervention group than in the control group (97.5% CI [-2.37; 8.61],  $p = 0.203$ ). The effect was not significant at the (Bonferroni-corrected) 2.5% level. They did not find any statistically significant improvement in systolic BP.

The study by Schwarze et al [31] measured the effect of a question prompt list (QPL) intervention versus usual care among older patients. The QPL intervention target informational needs of patients considering major surgery and include 11 questions that prompt patients and their family members to query their surgeon about treatment options etc. The study population was conducted among surgeons who perform high-risk oncologic or vascular operations on older patients with comorbidities. They measured patient engagement and well-being, including anxiety in patients. For instance, on average, anxiety scores were 1.3 (95% CI, 0.2-2.4) points higher for patients in the QPL intervention group. The authors concluded that these effects were less than the minimally important difference and that the QPL intervention in general did not influence patient engagement and well-being compared with usual care.

## DISCUSSION

### Statement of principal findings

This systematic review aimed to provide an overview of the effects of patient engagement interventions for older patients with multi-morbidity. From the 805 studies identified, only twelve studies met the inclusion criteria. The included studies were heterogeneous in characteristics of populations, number of participants, types of interventions to enhance patient-engagement, length of follow-up and outcome measures. A range of interventions ranging from prompt list to coaching sessions. This diversity in the evidence base challenges the ability to draw robust conclusion. Overall, the majority of studies showed improvements in health and patient-reported outcomes among patients participating in patient engagement interventions. There was some evidence to indicate that the clinical outcomes (BP, Hba1c, diabetes symptoms and glycaemic outcomes) were improved. Furthermore, some evidence indicates improvements in quality of life (EuroQol, QALY, self-rated health) and fewer health care visits (hospitals, GOPC). However, one study found no significant improvements in quality of life, another study found no significant improvements in patient well-being and anxiety symptoms, and a third study found no significant improvements in BP. As indicated by the limited number of studies and the wide heterogeneity in characteristics of populations, types of interventions to enhance patient-engagement, outcome measures and length of follow-up, there is a need for more substantial studies evaluating patient-engagement tools for both implementation and effect in older patients with multi-morbidity using more longer-term outcomes to capture both patient, provider and system-level effects of patient-engagement. While our review adds to the important field of ensuring that interventions to enhance patient-engagement are developed, implemented and evaluated specifically in the growing population of older adults living with multi-morbidity, the review supports previous work in finding too fragile evidence for robust conclusions to be made.[10-15]

### Strengths

This review has several strengths. This review contributes to providing a more substantive evidence base to guide prioritisation and implementation into mainstream healthcare delivery. Since patient-engagement aims at improving care overall, this review did not restrict itself to studies based on particular health outcomes, and consequently studies into a range of health and patient-reported outcomes were included. Another strength is that the systematic literature search that was undertaken adhering to a pre-specified protocol. To standardise our assessment process, we used DistillerSR to upload the bibliographic reference information. We performed a wide search to allow different study designs to include methodological heterogeneity. However, the majority of the included studies were RCT. Two researchers independently selected studies collected data and rated quality of included studies using GRADE method. Discrepancies

1  
2  
3  
4  
5  
6  
7  
8  
9  
10  
11  
12  
13  
14  
15  
16  
17  
18  
19  
20  
21  
22  
23  
24  
25  
26  
27  
28  
29  
30  
31  
32  
33  
34  
35  
36  
37  
38  
39  
40  
41  
42  
43  
44  
45  
46  
47  
48  
49  
50  
51  
52  
53  
54  
55  
56  
57  
58  
59  
60

were resolved by consensus. We used a transparent framework for developing and presenting summaries of evidence. GRADE is the most widely adopted tool for grading the quality of evidence.

### **Limitations**

Despite of the systematic approach adopted; this review has its limitations. The literature search was completed using two key databases, but additional peer-reviewed articles might have been found by searching and including from a broader range of sources. Relevant articles were excluded if they were published in languages other than English, Danish, Swedish, or Norwegian. Another limitation relates to the differences in transparency as to population characteristics across articles which affected our ability to ascertain types of multi-morbid conditions and the extent of multi-morbidity in the study populations. A minority of the included studies had small participant numbers which might have affected power of the studies. Two studies included less than 100 patients in total. Meta-analysis was not conducted as there was heterogeneity in the outcomes and measurement tools used in the studies. Overall, the quality of the included studies was of low to moderate. Some aspects of quality assessment and risk of bias were unclear across the included studies. This complicates the overall quality assessment. Furthermore, we did not seek clarification with the study authors about whether our assessment of risk of bias in the individual studies was correct.

### **Implications**

This review has highlighted the possible improvements in health and patient-reported outcomes among patients exposed to patient-engagement interventions. However, the evidence base is inconsistent and the quality of the studies is relatively low. Further high quality studies in larger populations over longer time-periods are needed to investigate the long-term effect of patient-engagement interventions.

### **CONCLUSION**

This systematic review found only limited evidence to support the improvements in health and patient-reported outcomes among older multi-morbid patients exposed to patient-engagement interventions. As the quality of the included studies was mostly low, the findings should be interpreted with caution, and there is a need for more robust studies into efficient approaches to engaging older adults with multi-morbidity in care trajectories.

### **DECLARATION OF CONFLICTING INTERESTS**

1  
2  
3  
4 The authors declare no potential conflicts of interest with respect to the research, authorship and/or  
5 publication of this article  
6  
7

#### 8 9 **FUNDING**

10 The authors disclosed receipt of the following financial support for the research, authorship, and/or  
11 publication of this article: This work was supported by [Nordea-fonden] grant number [02-2013-0200].  
12  
13  
14

#### 15 16 **AUTHOR CONTRIBUTIONS**

17 MBS and KA contributed equally to this paper. MK, MBS and KA designed the study. MBS and KA carried  
18 out data collection and analysis. All authors contributed to drafting the manuscript. All authors have read  
19 and approved the manuscript.  
20  
21  
22

#### 23 24 **DATA AVAILABILITY STATEMENT**

25 Data from the literature search and selection process are available upon reasonable request to the  
26 corresponding author.  
27  
28  
29

#### 30 31 **FIGURES**

32 Figure 1: Flowchart

33 Figure 2: Total GRADE

34 Figure 3: Risk of bias for randomised studies

35 Figure 4: Risk of bias for non-randomised studies  
36  
37  
38  
39  
40

#### 41 42 **ETHICS STATEMENT**

43 According to national guidelines, no ethics approval is needed for systematic reviews  
44  
45

#### 46 47 **REFERENCES**

- 48 1. *J Am Geriatr Soc*. Person-Centered Care: A Definition and Essential Elements. *Journal of the American*  
49 *Geriatrics Society*. 2016;64(1):15-8.  
50  
51 2. Hargraves I, Montori VM, Tilburt JC. Curare Aude-Caring for Patients, with Them. *J Clin Ethics*.  
52 2020;31(1):79-82.  
53  
54 3. Pieterse AH, Stiggelbout AM, Montori VM. Shared decision making and the importance of time. *JAMA*.  
55 2019;322(1):25-6.  
56  
57  
58  
59  
60



1  
2  
3  
4  
5  
6  
7  
8  
9  
10  
11  
12  
13  
14  
15  
16  
17  
18  
19  
20  
21  
22  
23  
24  
25  
26  
27  
28  
29  
30  
31  
32  
33  
34  
35  
36  
37  
38  
39  
40  
41  
42  
43  
44  
45  
46  
47  
48  
49  
50  
51  
52  
53  
54  
55  
56  
57  
58  
59  
60

4. Johnston MC, Crilly M, Black C, Prescott GJ, Mercer SW. Defining and measuring multimorbidity: a systematic review of systematic reviews. *European journal of public health*. 2019;29(1):182-9.
5. Davies LE, Spiers G, Kingston A, Todd A, Adamson J, Hanratty B. Adverse Outcomes of Polypharmacy in Older People: Systematic Review of Reviews. *Journal of the American Medical Directors Association*. 2020;21(2):181-7.
6. Uijen AA, van de Lisdonk EH. Multimorbidity in primary care: Prevalence and trend over the last 20 years. *EJGP*. 2008;14(sup1):28-32.
7. van Oostrom SH, Gijzen R, Stirbu I, Korevaar JC, Schellevis FG, Picavet HSJ, et al. Time Trends in Prevalence of Chronic Diseases and Multimorbidity Not Only due to Aging: Data from General Practices and Health Surveys. *PloS one*. 2016;11(8):e0160264.
8. Spencer-Bonilla G, Thota A, Organick P, Ponce OJ, Kunneman M, Giblon R, et al. Normalization of a conversation tool to promote shared decision making about anticoagulation in patients with atrial fibrillation within a practical randomized trial of its effectiveness: a cross-sectional study. *Trials*. 2020;21:1-10.
9. Fernando AT, Arroll B, Consedine NS. Enhancing compassion in general practice: it's not all about the doctor. *BJGP*; 2016.
10. Sepucha KR, Simmons LH, Barry MJ, Edgman-Levitan S, Licurse AM, Chaguturu SK. Ten years, forty decision aids, and thousands of patient uses: shared decision making at Massachusetts General Hospital. *Health Aff*. 2016;35(4):630-6.
11. Rashid A. Choosing Together: encouraging person centred care and shared decision making. *BMJ (Clinical research ed)*. 2015;350.
12. Barry MJ, Edgman-Levitan S. Shared decision making—The pinnacle patient-centered care. *Apa PsycNET*. 2012.
13. Plsek P. *Crossing the Quality Chasm: A New Health System for the 21st Century*: The national academies of medicine; 2001.
14. Montori VM, Kunneman M, Brito JP. Shared decision making and improving health care: the answer is not in. *Jama*. 2017;318(7):617-8.
15. Butterworth J, Hays R, McDonagh S, Bower P, Pitchforth E, Richards S, et al. Involving older people with multimorbidity in decision-making about their primary healthcare: A Cochrane systematic review of interventions (abridged). *Patient Educ Couns*. 2020.
16. Elwyn G, Frosch DL, Kobrin S. Implementing shared decision-making: consider all the consequences. *Implement Sci*. 2015;11(1):114.



17. Guyatt G, Oxman AD, Akl EA, Kunz R, Vist G, Brozek J, et al. GRADE guidelines: 1. Introduction-GRADE evidence profiles and summary of findings tables. *Journal of clinical epidemiology*. 2011;64(4):383-94.
18. Sterne JA, Hernán MA, Reeves BC, Savović J, Berkman ND, Viswanathan M, et al. ROBINS-I: a tool for assessing risk of bias in non-randomised studies of interventions. *BMJ (Clinical research ed)*. 2016;355:i4919.
19. Higgins JP, Altman DG, Gøtzsche PC, Jüni P, Moher D, Oxman AD, et al. The Cochrane Collaboration's tool for assessing risk of bias in randomised trials. *BMJ (Clinical research ed)*. 2011;343:d5928.
20. Tinsel I, Buchholz A, Vach W, Siegel A, Dürk T, Buchholz A, et al. Shared decision-making in antihypertensive therapy: a cluster randomised controlled trial. *BMC family practice*. 2013;14(1):135.
21. Shively MJ, Gardetto NJ, Kodiath MF, Kelly A, Smith TL, Stepnowsky C, et al. Effect of patient activation on self-management in patients with heart failure. *J Cardiovasc Nurs*. 2013;28(1):20-34.
22. Salisbury C, Man M-S, Bower P, Guthrie B, Chaplin K, Gaunt DM, et al. Management of multimorbidity using a patient-centred care model: a pragmatic cluster-randomised trial of the 3D approach. *Lancet Glob Health*. 2018;392(10141):41-50.
23. Hochhalter AK, Song J, Rush J, Sklar L, Stevens A. Making the most of your healthcare intervention for older adults with multiple chronic illnesses. *Patient Educ Couns*. 2010;81(2):207-13.
24. Tay FHE, Thompson CL, Nieh CM, Nieh CC, Koh HM, Tan JJC, et al. Person-centered care for older people with dementia in the acute hospital. *Alzheimers Dement (N Y)*. 2018;4:19-27.
25. Wong CK, Wong WC, Lam CL, Wan Y, Wong WH, Chung K, et al. Effects of Patient Empowerment Programme (PEP) on clinical outcomes and health service utilization in type 2 diabetes mellitus in primary care: an observational matched cohort study. *PloS one*. 2014;9(5):e95328.
26. Ulin K, Olsson L-E, Wolf A, Ekman I. Person-centred care—An approach that improves the discharge process. *Eur J Cardiovasc Nurs*. 2016;15(3):e19-e26.
27. Mateo-Abad M, González N, Fullaondo A, Merino M, Azkargorta L, Giné A, et al. Impact of the CareWell integrated care model for older patients with multimorbidity: a quasi-experimental controlled study in the Basque Country. *BMC health services research*. 2020;20(1):613.
28. Naik AD, Hundt NE, Vaughan EM, Petersen NJ, Zeno D, Kunik ME, et al. Effect of Telephone-Delivered Collaborative Goal Setting and Behavioral Activation vs Enhanced Usual Care for Depression Among Adults With Uncontrolled Diabetes: A Randomized Clinical Trial. *JAMA network open*. 2019;2(8):e198634.
29. Reed RL, Roeger L, Howard S, Oliver-Baxter JM, Battersby MW, Bond M, et al. A self-management support program for older Australians with multiple chronic conditions: a randomised controlled trial. *Med J Aust*. 2018;208(2):69-74.

1  
2  
3  
4  
5  
6  
7  
8  
9  
10  
11  
12  
13  
14  
15  
16  
17  
18  
19  
20  
21  
22  
23  
24  
25  
26  
27  
28  
29  
30  
31  
32  
33  
34  
35  
36  
37  
38  
39  
40  
41  
42  
43  
44  
45  
46  
47  
48  
49  
50  
51  
52  
53  
54  
55  
56  
57  
58  
59  
60

30. Willadsen TG, Siersma V, Nielsen ABS, K ster-Rasmussen R, Guassora AD, Jarb l DE, et al. The effect of structured personal care on diabetes symptoms and self-rated health over 14 years after diabetes diagnosis. *Prim Care Diabetes*. 2018;12(4):354-63.

31. Schwarze ML, Buffington A, Tucholka JL, Hanlon B, Rathouz PJ, Marka N, et al. Effectiveness of a Question Prompt List Intervention for Older Patients Considering Major Surgery: A Multisite Randomized Clinical Trial. *JAMA surgery*. 2020;155(1):6-13.

For peer review only

Figure 1: Flowchart

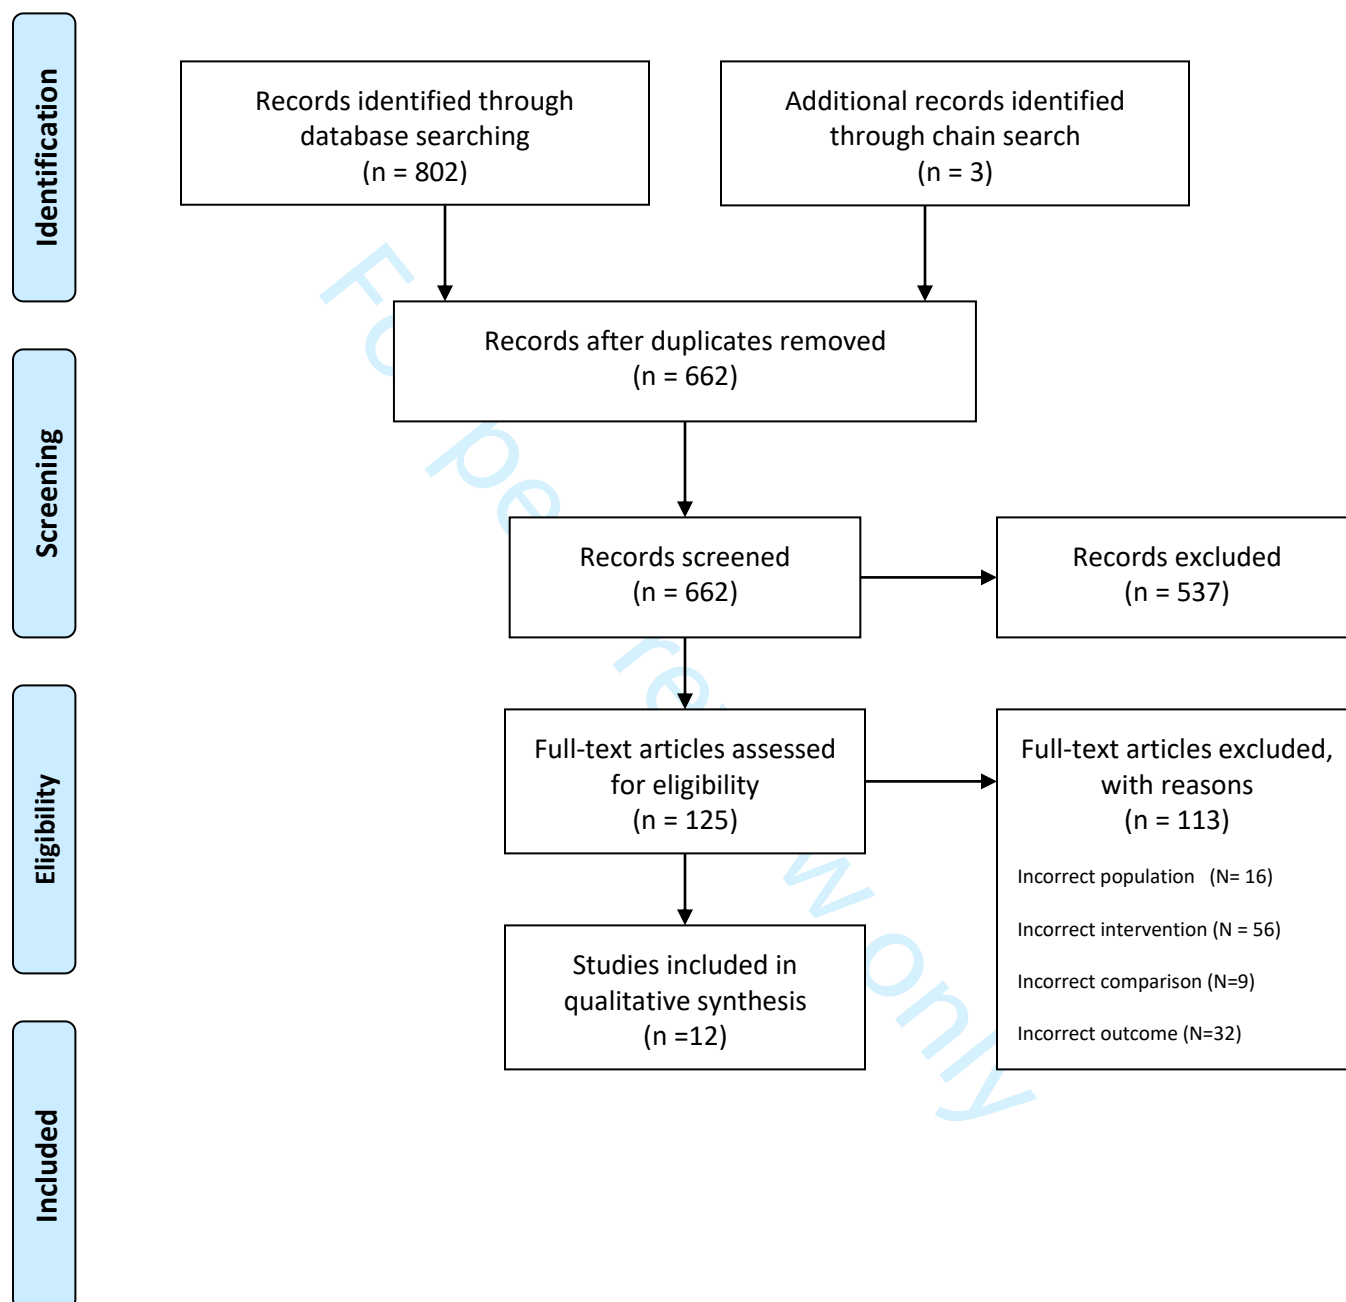

Figure 2: Total GRADE

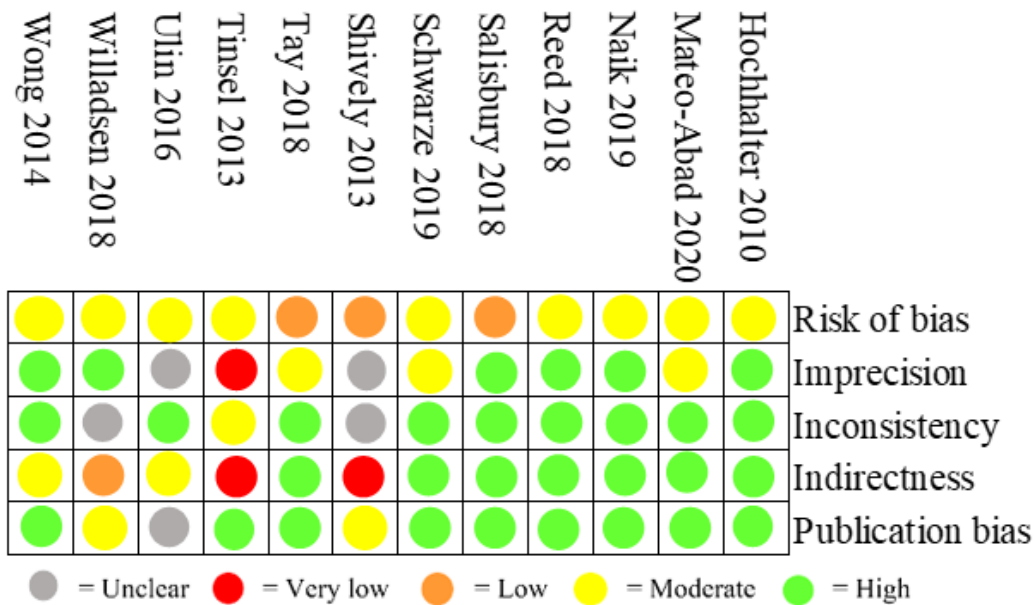

Peer review only

Figure 3: Risk of bias for randomised studies

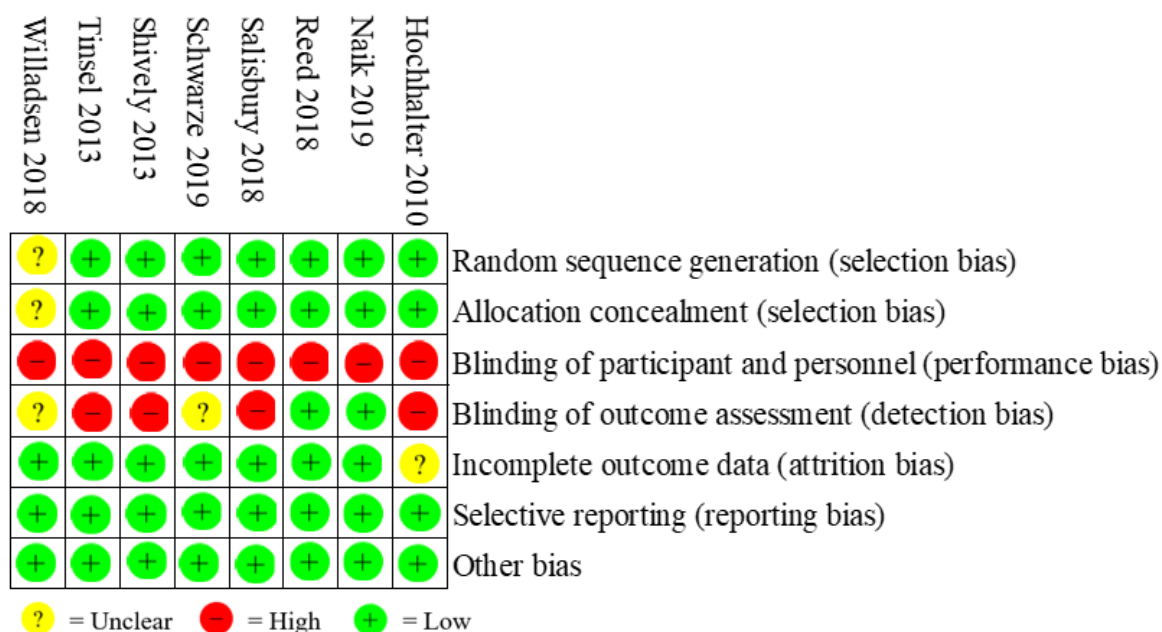

review only

Figure 4: Risk of bias for non-randomised studies

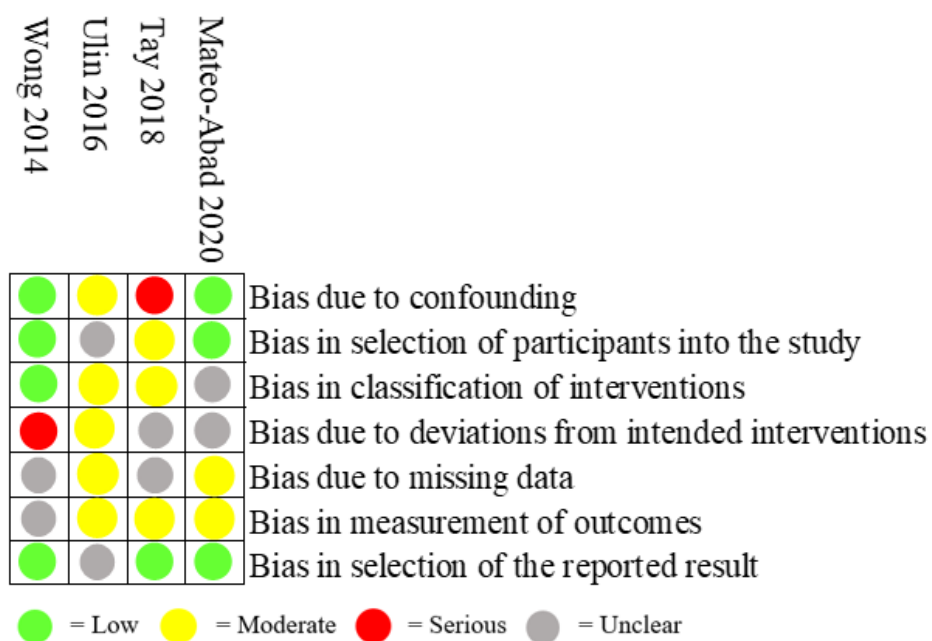

Appendix 1: Keywords and search string

| <b>Aspect 1:</b><br>Patient engagement | <b>AND</b> | <b>Aspect 2:</b><br>Multimorbidity    | <b>AND</b> | <b>Aspect:</b><br>Elderly |
|----------------------------------------|------------|---------------------------------------|------------|---------------------------|
| Person-centered care                   |            | Multimorbidity (MeSH)                 |            | Aged (MeSH)               |
| OR                                     |            | OR                                    |            | OR                        |
| Person centered care                   |            | Multi-morbidity                       |            | Aged                      |
| OR                                     |            | OR                                    |            | OR                        |
| Patient engagement                     |            | Multimorbidity                        |            | Elderly                   |
| OR                                     |            | OR                                    |            | OR                        |
| Patient empowerment                    |            | Multi-morbidities                     |            | Older adult               |
| OR                                     |            | OR                                    |            | OR                        |
| Patient involvement                    |            | Multi morbidities                     |            | Older adults              |
| OR                                     |            | OR                                    |            |                           |
| Patient participation<br>(MeSH)        |            | Comorbidity (MeSH)                    |            |                           |
|                                        |            | OR                                    |            |                           |
|                                        |            | Comorbidity                           |            |                           |
|                                        |            | OR                                    |            |                           |
|                                        |            | Co-morbidity                          |            |                           |
|                                        |            | OR                                    |            |                           |
|                                        |            | Comorbidities                         |            |                           |
|                                        |            | OR                                    |            |                           |
|                                        |            | Co-morbidities                        |            |                           |
|                                        |            | OR                                    |            |                           |
|                                        |            | Multiple chronic<br>conditions (MeSH) |            |                           |

1  
2  
3  
4  
5  
6  
7 ("person-centered care"[All Fields] OR "person-centered care"[All Fields] OR "patient engagement"[All  
8 Fields] OR "patient empowerment"[All Fields] OR "patient involvement"[All Fields] OR "patient  
9 participation"[All Fields] OR "patient participation"[MeSH Terms]) AND ("multimorbidity"[MeSH Terms] OR  
10 "multi-morbidity"[All Fields] OR "multi-morbidity"[All Fields] OR ("multimorbid"[All Fields] OR  
11 "multimorbidities"[All Fields] OR "multimorbidity"[MeSH Terms] OR "multimorbidity"[All Fields]) OR  
12 ("multimorbid"[All Fields] OR "multimorbidities"[All Fields] OR "multimorbidity"[MeSH Terms] OR  
13 "multimorbidity"[All Fields]) OR "multi-morbidities"[All Fields] OR "multi-morbidities"[All Fields] OR  
14 "comorbidity"[MeSH Terms] OR ("comorbid"[All Fields] OR "comorbidity"[MeSH Terms] OR  
15 "comorbidity"[All Fields] OR "comorbidities"[All Fields] OR "comorbids"[All Fields]) OR  
16 ("comorbidity"[MeSH Terms] OR "comorbidity"[All Fields] OR ("co"[All Fields] AND "morbidity"[All Fields])  
17 OR "co morbidity"[All Fields]) OR "co-morbidities"[All Fields] OR ("comorbid"[All Fields] OR  
18 "comorbidity"[MeSH Terms] OR "comorbidity"[All Fields] OR "comorbidities"[All Fields] OR "comorbids"[All  
19 Fields]) OR "multiple chronic conditions"[MeSH Terms] OR "multiple chronic diseases"[All Fields]) AND  
20 ("aged"[MeSH Terms] OR ("aged"[MeSH Terms] OR "aged"[All Fields]) OR ("aged"[MeSH Terms] OR  
21 "aged"[All Fields] OR "elderly"[All Fields] OR "elderlies"[All Fields] OR "elderly s"[All Fields] OR "elderlys"[All  
22 Fields]) OR "older adults"[All Fields] OR "older adult"[All Fields])  
23  
24  
25  
26  
27  
28  
29  
30  
31  
32  
33  
34  
35  
36  
37  
38  
39  
40  
41  
42  
43  
44  
45  
46  
47  
48  
49  
50  
51  
52  
53  
54  
55  
56  
57  
58  
59  
60



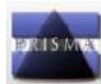

# PRISMA 2009 Checklist

| Section/topic                      | #  | Checklist item                                                                                                                                                                                                                                                                                              | Reported on page # |
|------------------------------------|----|-------------------------------------------------------------------------------------------------------------------------------------------------------------------------------------------------------------------------------------------------------------------------------------------------------------|--------------------|
| <b>TITLE</b>                       |    |                                                                                                                                                                                                                                                                                                             |                    |
| Title                              | 1  | Identify the report as a systematic review, meta-analysis, or both.                                                                                                                                                                                                                                         | 1                  |
| <b>ABSTRACT</b>                    |    |                                                                                                                                                                                                                                                                                                             |                    |
| Structured summary                 | 2  | Provide a structured summary including, as applicable: background; objectives; data sources; study eligibility criteria, participants, and interventions; study appraisal and synthesis methods; results; limitations; conclusions and implications of key findings; systematic review registration number. | 2                  |
| <b>INTRODUCTION</b>                |    |                                                                                                                                                                                                                                                                                                             |                    |
| Rationale                          | 3  | Describe the rationale for the review in the context of what is already known.                                                                                                                                                                                                                              | 4                  |
| Objectives                         | 4  | Provide an explicit statement of questions being addressed with reference to participants, interventions, comparisons, outcomes, and study design (PICOS).                                                                                                                                                  | 5                  |
| <b>METHODS</b>                     |    |                                                                                                                                                                                                                                                                                                             |                    |
| Protocol and registration          | 5  | Indicate if a review protocol exists, if and where it can be accessed (e.g., Web address), and, if available, provide registration information including registration number.                                                                                                                               | Not applicable     |
| Eligibility criteria               | 6  | Specify study characteristics (e.g., PICOS, length of follow-up) and report characteristics (e.g., years considered, language, publication status) used as criteria for eligibility, giving rationale.                                                                                                      | 5-9                |
| Information sources                | 7  | Describe all information sources (e.g., databases with dates of coverage, contact with study authors to identify additional studies) in the search and date last searched.                                                                                                                                  | 5                  |
| Search                             | 8  | Present full electronic search strategy for at least one database, including any limits used, such that it could be repeated.                                                                                                                                                                               | Appendix 1         |
| Study selection                    | 9  | State the process for selecting studies (i.e., screening, eligibility, included in systematic review, and, if applicable, included in the meta-analysis).                                                                                                                                                   | 5                  |
| Data collection process            | 10 | Describe method of data extraction from reports (e.g., piloted forms, independently, in duplicate) and any processes for obtaining and confirming data from investigators.                                                                                                                                  | 5-6                |
| Data items                         | 11 | List and define all variables for which data were sought (e.g., PICOS, funding sources) and any assumptions and simplifications made.                                                                                                                                                                       | 5                  |
| Risk of bias in individual studies | 12 | Describe methods used for assessing risk of bias of individual studies (including specification of whether this was done at the study or outcome level), and how this information is to be used in any data synthesis.                                                                                      | 6                  |
| Summary measures                   | 13 | State the principal summary measures (e.g., risk ratio, difference in means).                                                                                                                                                                                                                               | N/A                |
| Synthesis of results               | 14 | Describe the methods of handling data and combining results of studies, if done, including measures of consistency (e.g., $I^2$ ) for each meta-analysis.                                                                                                                                                   | Not applicable     |



# PRISMA 2009 Checklist

Page 1 of 2

| Section/topic                 | #  | Checklist item                                                                                                                                                                                           | Reported on page # |
|-------------------------------|----|----------------------------------------------------------------------------------------------------------------------------------------------------------------------------------------------------------|--------------------|
| Risk of bias across studies   | 15 | Specify any assessment of risk of bias that may affect the cumulative evidence (e.g., publication bias, selective reporting within studies).                                                             | 6, 11-12           |
| Additional analyses           | 16 | Describe methods of additional analyses (e.g., sensitivity or subgroup analyses, meta-regression), if done, indicating which were pre-specified.                                                         | Not applicable     |
| <b>RESULTS</b>                |    |                                                                                                                                                                                                          |                    |
| Study selection               | 17 | Give numbers of studies screened, assessed for eligibility, and included in the review, with reasons for exclusions at each stage, ideally with a flow diagram.                                          | 6, Figure 1        |
| Study characteristics         | 18 | For each study, present characteristics for which data were extracted (e.g., study size, PICOS, follow-up period) and provide the citations.                                                             | 6-10               |
| Risk of bias within studies   | 19 | Present data on risk of bias of each study and, if available, any outcome level assessment (see item 12).                                                                                                | 9-10               |
| Results of individual studies | 20 | For all outcomes considered (benefits or harms), present, for each study: (a) simple summary data for each intervention group (b) effect estimates and confidence intervals, ideally with a forest plot. | 10-13              |
| Synthesis of results          | 21 | Present results of each meta-analysis done, including confidence intervals and measures of consistency.                                                                                                  | Not applicable     |
| Risk of bias across studies   | 22 | Present results of any assessment of risk of bias across studies (see Item 15).                                                                                                                          | Figure 3 and 4     |
| Additional analysis           | 23 | Give results of additional analyses, if done (e.g., sensitivity or subgroup analyses, meta-regression [see Item 16]).                                                                                    | Not applicable     |
| <b>DISCUSSION</b>             |    |                                                                                                                                                                                                          |                    |
| Summary of evidence           | 24 | Summarize the main findings including the strength of evidence for each main outcome; consider their relevance to key groups (e.g., healthcare providers, users, and policy makers).                     | 14-15              |
| Limitations                   | 25 | Discuss limitations at study and outcome level (e.g., risk of bias), and at review-level (e.g., incomplete retrieval of identified research, reporting bias).                                            | 15                 |
| Conclusions                   | 26 | Provide a general interpretation of the results in the context of other evidence, and implications for future research.                                                                                  | 15                 |
| <b>FUNDING</b>                |    |                                                                                                                                                                                                          |                    |
| Funding                       | 27 | Describe sources of funding for the systematic review and other support (e.g., supply of data); role of funders for the systematic review.                                                               | 16                 |

From: Moher D, Liberati A, Tetzlaff J, Altman DG, The PRISMA Group (2009). Preferred Reporting Items for Systematic Reviews and Meta-Analyses: The PRISMA Statement. PLoS Med 6(7): e1000097. doi:10.1371/journal.pmed1000097

For more information on this journal visit [www.bmj.com/journal/319](http://www.bmj.com/journal/319) or [www.prismastatement.com/tutorials/index.xhtml](http://www.prismastatement.com/tutorials/index.xhtml)

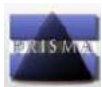

# PRISMA 2009 Checklist

For peer review only

- 1
- 2
- 3
- 4
- 5
- 6
- 7
- 8
- 9
- 10
- 11
- 12
- 13
- 14
- 15
- 16
- 17
- 18
- 19
- 20
- 21
- 22
- 23
- 24
- 25
- 26
- 27
- 28
- 29
- 30
- 31
- 32
- 33
- 34
- 35
- 36
- 37
- 38
- 39
- 40
- 41
- 42
- 43
- 44
- 45
- 46
- 47

# BMJ Open

## Systematic review of patient-engagement interventions: potentials for enhancing person-centred care for older patients with multi-morbidity

|                                 |                                                                                                                                                                                                                                                                               |
|---------------------------------|-------------------------------------------------------------------------------------------------------------------------------------------------------------------------------------------------------------------------------------------------------------------------------|
| Journal:                        | <i>BMJ Open</i>                                                                                                                                                                                                                                                               |
| Manuscript ID                   | bmjopen-2020-048558.R2                                                                                                                                                                                                                                                        |
| Article Type:                   | Original research                                                                                                                                                                                                                                                             |
| Date Submitted by the Author:   | 19-Nov-2021                                                                                                                                                                                                                                                                   |
| Complete List of Authors:       | Søgaard, Mathilde Bendix; University of Copenhagen Faculty of Health and Medical Sciences, Center of Healthy Aging & Department of Public Health<br>Andresen, Katrine; University of Copenhagen,<br>Kristiansen, Maria; University of Copenhagen, Department of Public Health |
| <b>Primary Subject Heading</b>: | Patient-centred medicine                                                                                                                                                                                                                                                      |
| Secondary Subject Heading:      | Health services research, Public health                                                                                                                                                                                                                                       |
| Keywords:                       | PUBLIC HEALTH, GERIATRIC MEDICINE, Quality in health care < HEALTH SERVICES ADMINISTRATION & MANAGEMENT                                                                                                                                                                       |
|                                 |                                                                                                                                                                                                                                                                               |

SCHOLARONE™  
Manuscripts

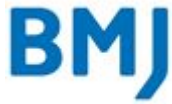

I, the Submitting Author has the right to grant and does grant on behalf of all authors of the Work (as defined in the below author licence), an exclusive licence and/or a non-exclusive licence for contributions from authors who are: i) UK Crown employees; ii) where BMJ has agreed a CC-BY licence shall apply, and/or iii) in accordance with the terms applicable for US Federal Government officers or employees acting as part of their official duties; on a worldwide, perpetual, irrevocable, royalty-free basis to BMJ Publishing Group Ltd ("BMJ") its licensees and where the relevant Journal is co-owned by BMJ to the co-owners of the Journal, to publish the Work in this journal and any other BMJ products and to exploit all rights, as set out in our [licence](#).

The Submitting Author accepts and understands that any supply made under these terms is made by BMJ to the Submitting Author unless you are acting as an employee on behalf of your employer or a postgraduate student of an affiliated institution which is paying any applicable article publishing charge ("APC") for Open Access articles. Where the Submitting Author wishes to make the Work available on an Open Access basis (and intends to pay the relevant APC), the terms of reuse of such Open Access shall be governed by a Creative Commons licence – details of these licences and which [Creative Commons](#) licence will apply to this Work are set out in our licence referred to above.

Other than as permitted in any relevant BMJ Author's Self Archiving Policies, I confirm this Work has not been accepted for publication elsewhere, is not being considered for publication elsewhere and does not duplicate material already published. I confirm all authors consent to publication of this Work and authorise the granting of this licence.

1  
2  
3  
4 **Systematic review of patient-engagement interventions: potentials for enhancing person-centred care**  
5 **for older patients with multi-morbidity**  
6  
7

8 Mathilde Bendix Søggaard, MSc Public Health, Consultant, mbs02@live.dk, +4526791119, Center for Healthy  
9 Aging & Department of Public Health, Faculty of Health and Medical Sciences, University of Copenhagen,  
10 Øster Farimagsgade 5, 1014 Copenhagen K, Denmark  
11  
12  
13

14  
15 Katrine Andresen, MSc Public Health, Clinical research coordinator, k\_andresen95@hotmail.com,  
16 +4560388971, Center for Healthy Aging & Department of Public Health, Faculty of Health and Medical  
17 Sciences, University of Copenhagen, Øster Farimagsgade 5, 1014 Copenhagen K, Denmark  
18  
19  
20

21  
22 Maria Kristiansen\*, PhD Public Health, Associate professor, [makk@sund.ku.dk](mailto:makk@sund.ku.dk), +4535334805, Center for  
23 Healthy Aging & Department of Public Health, Faculty of Health and Medical Sciences, University of  
24 Copenhagen, Øster Farimagsgade 5, 1014 Copenhagen K, Denmark  
25  
26  
27

28 \* Corresponding author  
29  
30

31  
32 KEYWORDS: PUBLIC HEALTH, GERIATRIC MEDICINE, QUALITY IN HEALTH CARE  
33  
34

35  
36 Word count: 4157 words  
37  
38  
39  
40  
41  
42  
43  
44  
45  
46  
47  
48  
49  
50  
51  
52  
53  
54  
55  
56  
57  
58  
59  
60

1  
2  
3  
4  
5  
6  
7  
8  
9  
10  
11  
12  
13  
14  
15  
16  
17  
18  
19  
20  
21  
22  
23  
24  
25  
26  
27  
28  
29  
30  
31  
32  
33  
34  
35  
36  
37  
38  
39  
40  
41  
42  
43  
44  
45  
46  
47  
48  
49  
50  
51  
52  
53  
54  
55  
56  
57  
58  
59  
60**ABSTRACT**

**Introduction:** Person-centred care based on systematic and comprehensive patient-engagement is gaining momentum across healthcare systems. Providing care that is responsive to the needs, values and priorities of each patient is important for patients, relatives, and providers alike, not least for the growing population of older patients living with multi-morbidity and associated complex care trajectories.

**Objectives:** The aim of this systematic review is to investigate the effects of patient engagement interventions for older patients with multi-morbidity.

**Methods:** Systematic review conducted in August 2021. Two reviewers independently screened the international databases Embase and PubMed. Reviewers carried out duplicate and independent data extraction and assessment of study quality. GRADE (Grading of Recommendations Assessment, Development, and Evaluation) was used to assess the quality of the evidence for each study.

**Results:** We included twelve studies from primary care setting and hospitals. The included studies were heterogeneous in terms of characteristics of populations, types of interventions to enhance patient-engagement, outcome measures and length of follow-up. Nine of the twelve included studies found significant improvements in health and patient-reported-outcomes such as higher quality adjusted life years, fewer hospital visits and disease specific symptoms. Quality of the included studies was of low to moderate.

**Conclusion:** This review identifies potential beneficial effects of interventions to enhance patient-engagement in older adults with multi-morbidity. Nevertheless, the limited and very diverse evidence-base calls for more robust studies into efficient approaches to engaging older adults with multi-morbidity in care trajectories.

## ARTICLE SUMMARY

### Strengths and limitations of this study

- This systematic review explores the understudied field of interventions to enhance patient-engagement in the growing population of older adults with multi-morbidity
- Included studies are not limited to specific health-and patient-reported outcomes in order to capture the broad effectiveness of these interventions
- Meta-analysis was not possible due to heterogeneity in methods and outcomes
- Quality of the included studies was low to moderate overall, hence there is a need for more robust studies using a range of outcomes to identify best practices in patient-engagement in the context of multi-morbidity in old age.



## INTRODUCTION

Person-centred care is defined as care that is based on elicitation of and responsiveness to the individual patient's needs, values, resources and life situation.[1] In increasingly complex and prolonged treatment trajectories, engaging older patients in a timely, systematic and holistic manner may improve experiences and outcomes for patients and relatives, and enhance meaningfulness among healthcare professionals. Furthermore, it may support adequate use of scarce healthcare resources as treatment plans are tailored to individual needs, potentially improving engagement of more disadvantaged patients and ultimately decreasing social inequality in healthcare utilization.[2, 3]

Identifying the best care trajectory in the light of the uniqueness of each patient's circumstances is particularly important for the growing population of older patients living with multi-morbidity, defined as patients living with two or more co-existing long term conditions,[4] and associated polypharmacy requiring prolonged and complex care trajectories across care settings.[5-7] In the context of population ageing and increased multi-morbidity, more systematically and timely offered conversations with patients related to future scenarios and priorities is crucial. This includes a range of complex decisions on prognosis, treatment options and prioritizing care at the end of life driven by patient perspectives on what is acceptable and meaningful to him/her. Person-centred care requires empowered patients who are met by a responsive and accessible health care system with a culture of engagement, sufficient time, and a skill-set that nurtures daily practices based on unlocking patient perspectives and delivering coherent care to reflect these.[3, 8, 9] While there is overall agreement concerning the importance of person-centred care, there is little scientific evidence documenting significant outcomes of patient engagement regarding patient satisfaction, enhanced shared decision-making, adjustment of treatment plans, or use of resources.[10-14] A recent systematic review[15] aimed at assessing the effect of interventions for older patients with multi-morbidity aiming to involve them in decision-making in primary care consultations found too limited evidence to interpret with certainty. This systematic review included only randomised-controlled trial's (RCT) in primary health care. To investigate this topic further we included both RCTs and non-randomised studies in primary and secondary health care settings. More focus on patient-engagement tools as interventions to enhance person-centred care in clinical encounters is needed to provide a more substantive evidence base to guide prioritization and implementation into mainstream healthcare delivery.[16] The aim of the systematic review is to investigate the current evidence for effectiveness of patient-engagement tools in enhancing person-centred care for older adults (60+ year) with more than one disease.

## METHODS

### Literature search and study selection

The review is based on systematic literature searches conducted in December 2019 and updated August 2021 using the databases PubMed and Embase. Furthermore, reference lists of included articles were assessed to identify additional peer-reviewed articles. The complete list of search terms, including MESH terms and free text terms, is presented in Appendix 1.

The software DistillerSR was used to screen and review the studies. Data were independently extracted onto a customised data extraction sheet in DistillerSR by two reviewers, and any discrepancies were resolved by discussion.

The eligibility criteria for study inclusion were as follows:

- Population: Older adults above the age of 60 living with two or more co-existing diseases.
- Intervention: Patient engagement intervention in health care system settings.
- Comparison groups: Older patients who received usual care.
- Outcome: Any patient-related outcome e.g. reduced symptoms of disease, reduced duration of disease, reduced costs and reduced hospital stay or rehospitalisation.

We included quantitative observational studies such as prospective and retrospective cohort studies and RCTs. Studies in any geographical area in health care systems, thus encompassing both primary and secondary care settings, were included, and only studies written in English and in one of the Scandinavian languages (Danish, Swedish or Norwegian) were included.

Two investigators independently screened the titles, abstracts and full texts for inclusion and exclusion criteria. We excluded commentaries, editorials and studies that did not directly apply a patient-engagement intervention as an exposure. We did not exclude studies based on publication date.

First, the titles of the 805 studies were screened for eligibility. Secondly, duplicates were removed. Third, the abstracts of the studies were screened. Fourth, the full texts of studies initially assessed as relevant for the review were checked against our inclusion or exclusion criteria. Disagreements between the two investigators were resolved by consensus. Figure 1 shows reasons for exclusion for potentially eligible studies.

### Data extraction

Two investigators independently extracted information on characteristics of participants, study design, patient engagement intervention and outcomes. Discrepancies in data extraction were resolved by consensus between the two investigators.

1  
2  
3  
4  
5  
6  
7  
8  
9  
10  
11  
12  
13  
14  
15  
16  
17  
18  
19  
20  
21  
22  
23  
24  
25  
26  
27  
28  
29  
30  
31  
32  
33  
34  
35  
36  
37  
38  
39  
40  
41  
42  
43  
44  
45  
46  
47  
48  
49  
50  
51  
52  
53  
54  
55  
56  
57  
58  
59  
60

## Quality assessment

The included studies encompassed a combination of RCT and observational studies. To assess the quality of evidence, we used GRADE (Grading of Recommendations, Assessment, Development, and Evaluation) for all the included studies. GRADE is a transparency framework and is the most widely adopted tool for grading the quality of evidence. The checklist assesses quality of the study across eight domains. The evidence level can be rated down or up depending on missing or existing domains. GRADE certainty ratings have four levels as follows: very low, low, moderate, high. Very low means that the true effect is probably markedly different from the estimated effect. High means that the authors have a lot of confidence that the true effect of is similar to the estimated effect,[17]. To assess the domain risk of bias within GRADE we used two different measures depending on whether the study was randomised or non-randomised. In non-randomised studies we used ROBINS-I to assess risk of bias, which is a tool to understand and appraise strengths and weaknesses in non-randomised studies.[18] In RCTs we used Cochrane Collaboration's tool for assessing risk of bias.[19] Two investigators independently performed a quality assessment of each study. Disagreements were resolved by consensus.

## Patient and Public Involvement Statement

Patients were not involved in this systematic review.

## RESULTS

### Description of included studies

Figure 1 shows the PRISMA diagram in the phases from the 805 studies that were identified to the twelve studies that met the inclusion criteria. The main reason for exclusion were due to lack of specific interventions. Table 1 depicts the characteristics of the twelve included studies. The included studies were mainly RCT studies.

Table 1: Study characteristics of included studies

| Study                          | Location             | Design                      | Participants                                                                                                                                               | Multi-morbidity                                                                                                                                                    | Intervention                                                                                                                                   | Setting                                                            | Endpoint                                                                                                                                                                                     |
|--------------------------------|----------------------|-----------------------------|------------------------------------------------------------------------------------------------------------------------------------------------------------|--------------------------------------------------------------------------------------------------------------------------------------------------------------------|------------------------------------------------------------------------------------------------------------------------------------------------|--------------------------------------------------------------------|----------------------------------------------------------------------------------------------------------------------------------------------------------------------------------------------|
| <b>Hochhalter et al., 2010</b> | USA                  | Randomised Controlled Trial | 26 patients in appointment group, 27 in safety group, and 26 in usual group.<br>Mean age 76 in appointment group, 73 in safety group and 73 in usual group | At least two of the following chronic illnesses: arthritis, lung disease, heart disease, diabetes, hypertension, depression, or osteoporosis                       | Patient engagement, patient group workshop and individual coaching intervention                                                                | Primary care clinics, Scott & White Center for Diagnostic Medicine | PAM-13, Communication with physician's scale, HRQOL-14                                                                                                                                       |
| <b>Mateo-Abad et al. 2020</b>  | Spain                | Quasi-experimental study    | 101 patients in the intervention group and 99 patients in the usual care group.<br>Mean age 79                                                             | A minimum of two chronic diseases, with at least one of them being chronic obstructive pulmonary disease (COPD), diabetes mellitus, or chronic heart failure (CHF) | Care coordination and communication between health providers and patient empowerment and home-based care; all supported by ICT-based platforms | Integrated care organisations                                      | Use of services, clinical variables (such as BMI, blood pressure, heart rate, blood glucose), Geriatric depression scale (GDS), Functional status (Barthel Index)                            |
| <b>Naik et al. 2019</b>        | USA                  | Randomised Controlled Trial | 136 in the intervention group, and 89 in control group.<br>Mean age 61                                                                                     | Uncontrolled diabetes and depression                                                                                                                               | Proactive population screening and telephone delivery of a collaborative goal-setting intervention                                             | Veterans Affairs Medical Center                                    | Change in depression symptoms using PHQ-9 and HbA1c                                                                                                                                          |
| <b>Reed et al., 2018</b>       | Australia            | Randomised controlled trial | 114 in the intervention group, and 117 in the control group.<br>Age range: 60+                                                                             | At least two chronic diseases                                                                                                                                      | Self-management support program for older with multiple chronic conditions                                                                     | General practices                                                  | Self-rated health                                                                                                                                                                            |
| <b>Salisbury et al., 2018</b>  | England and Scotland | Cluster-randomised trial    | 797 patients in the intervention group, and 759 in the usual care group. Mean age 71 in intervention group and 70,7 in the usual care group                | At least three types of chronic conditions                                                                                                                         | Patient-centered strategies for management of multi-morbidity, 3D intervention                                                                 | General practices                                                  | Eq-5d-5l                                                                                                                                                                                     |
| <b>Schwarze et al. 2020</b>    | USA                  | Randomised controlled trial | 223 patients in the intervention group, and 223 patients in the usual care group.<br>Mean age 71 in intervention group and 72.6 in usual care group        | At least one comorbidity and an oncologic or vascular problem                                                                                                      | Question prompt list brochure targeting informational needs of patients considering major surgery                                              | Surgeons' clinics                                                  | Number of questions asked by patients and family during the recorded visit, Perceived Efficacy in Patient-Physician Interactions (PEPPI-5), Measure Yourself Concerns and Well-being (MYCaW) |

| Study                        | Location  | Design                                        | Participants                                                                                                                                  | Multi-morbidity                                                                                                                                                      | Intervention                                                                            | Setting                                                                       | Endpoint                                                                                                                                                                                                |
|------------------------------|-----------|-----------------------------------------------|-----------------------------------------------------------------------------------------------------------------------------------------------|----------------------------------------------------------------------------------------------------------------------------------------------------------------------|-----------------------------------------------------------------------------------------|-------------------------------------------------------------------------------|---------------------------------------------------------------------------------------------------------------------------------------------------------------------------------------------------------|
| <b>Shively et al. 2013</b>   | USA       | Randomised, 2-group, repeated-measures design | 43 patients in the Intervention group, and 41 in the group with usual care. Mean age 66,1 years                                               | Heart failure and comorbidities                                                                                                                                      | Patient activation intervention compared with usual care in patients with Heart failure | Veterans Affairs San Diego Healthcare System                                  | Patient Activation Measure, (PAM), Self-Care of Heart Failure Index (SCHIF), Medical Outcomes Study (MOS)                                                                                               |
| <b>Tay et al. 2018</b>       | Singapore | Prospective cohort study                      | 170 in the intervention group and 60 in the control group. Mean age in the intervention group is 82 years and 84 years in control group       | Dementia and comorbidities                                                                                                                                           | Person-centered care in Care for Acute Mentally Infirm Elders (CAMIE)                   | Hospital                                                                      | Well-being (WB)<br>Ill-being (IB)<br>Pittsburg Agitation Scale (PAS)<br>Modified Barthel Index (MBI)<br>EQ-5D Index Score                                                                               |
| <b>Tinsel et al. 2013</b>    | Germany   | Cluster Randomised Controlled Trial           | 552 patients in the intervention group, and 568 in the control group. Mean age 63,8 in intervention group and 65 in control group             | Hypertension and at least one relevant comorbid disorder (diabetes mellitus, coronary heart disease, heart attack, stroke, or peripheral arterial occlusive disease) | Shared decision-making in General practice with patients with uncontrolled hypertension | General practice                                                              | SDM-Q-9, systolic blood pressure                                                                                                                                                                        |
| <b>Ulin et al. 2016</b>      | Sweden    | Controlled before-and-after design            | 125 patients in the intervention group, and 123 in control group. Mean age range: 77-80                                                       | Chronic heart failure and comorbidities                                                                                                                              | Gothenburg Person-centered care (gPCC) in patients hospitalized                         | Department of Medicine at Sahlgrenska University Hospital/Östra in Gothenburg | Number of days from admission to<br>1. first notice to the municipality<br>2. second notice to the municipality<br>3. notice to the municipality that the patient was ready for discharge from hospital |
| <b>Wong et al. 2014</b>      | Hong Kong | Observational matched cohort study            | 1.141 in the intervention group and 1.141 in the control group. Mean age 64                                                                   | Type 2 diabetes mellitus and hypertension                                                                                                                            | Patient Empowerment Program in General Outpatient Clinics (GOPC)                        | General Outpatient Clinics (GOPC)                                             | HbA1c, Systolic blood pressure (SBP), Diastolic blood pressure (DBP), LDL-cholesterol                                                                                                                   |
| <b>Willadsen et al. 2018</b> | Denmark   | Randomised Controlled Trial                   | 970 patients in the intervention group and 539 in the group with usual care. Mean age 64,7 in intervention group and 64,5 in usual care group | Diabetes and multi-morbidity                                                                                                                                         | Structured personnel care in patients with diabetes                                     | General practice                                                              | Self-rated health, diabetes symptoms                                                                                                                                                                    |

1  
2  
3  
4  
5  
6  
7  
8  
9  
10  
11  
12  
13  
14  
15  
16  
17  
18  
19  
20  
21  
22  
23  
24  
25  
26  
27  
28  
29  
30  
31  
32  
33  
34  
35  
36  
37  
38  
39  
40  
41  
42  
43  
44  
45  
46

For peer review only

1  
2  
3  
4 The sample sizes of the twelve included studies ranged widely across studies (mean: 684 patients, range 79-  
5 2282). Five studies (42%) were conducted in the Europe, four (33%) in US, and three (25%) elsewhere. The  
6 most common study design was RCT (n=8; 67%) followed by Cohort/observational (n=3; 25%) and quasi-  
7 experimental design (n=1; 8%). Most studies were conducted in a primary care setting (n=7; 58%). A total of  
8 five studies (42%) were conducted in general hospitals involving patients from a range of specialties. In the  
9 studies, the participants have many different diseases such as diabetes, chronic heart failure or dementia.  
10 The mean age in the studies was +60 years with a range: 60- 84 years, however, there were two studies  
11 that did not indicate the mean age but included an 18+ year population with most 60+ years. A wide range  
12 of multi-morbidities is represented in the included studies with some focusing more widely on engagement  
13 of patients with multiple coexisting diseases whereas others targeted specific diseases in patients with  
14 comorbidities.

15 The included studies used different patient engagement interventions, such as coaching, health care  
16 communication, goal setting interventions, self-management program, 3D intervention, prompt list, and  
17 disease-specific sessions. Different types of primary outcomes were used in studies such as Patient  
18 Activations Measurements (PAM), Self-Rated health (SRH), hospitalisation, use of health services, change in  
19 clinical outcomes (e.g. BMI, blood pressure, blood glucose), Modified Barthel Index (MBI), and quality of  
20 life. Disease specific outcomes such as blood pressure, Cholesterol level and blood glucose were used in  
21 some of the studies.

### 22 **Quality of included studies**

23 Figure 2 shows the quality assessment for each included study. Three studies were assessed to be of high  
24 quality in all domains apart from one, which was judged to be low or moderate. An additional five studies  
25 were assessed to be of high quality apart from two domains, which was judged to be low or moderate. The  
26 last four studies were only judged to be of high quality in one or none of the five domains.

27 Risk of bias for RCTs is shown in figure 3. All studies had high risk of bias due to blinding of participants and  
28 personnel (performance bias). Furthermore, four studies were rated to high risk of blinding of outcome  
29 assessment (detection bias).[20-23]

30 Figure 4 show risk of bias for non-randomised studies. Two studies were rated to have high risk of bias, and  
31 two studies were rated moderate risk of bias. One study had high risk of bias due to confounding,[24] and  
32 another study had high risk of bias due to deviations from intended intervention.[25] One study rated to  
33 moderate risk of bias had moderate risk of bias in five categories[26], and the other had moderate risk of  
34 bias in two categories [27].All four studies had unclear risk of bias in more than one category.

1  
2  
3  
4 In total, the quality of the included studies was of low to moderate and some aspects of quality assessment  
5 and risk of bias were unclear across the included studies.  
6  
7

### 8 **Effect of the interventions**

9

10 The included studies are using different endpoints to measure the effect of patient engagement  
11 interventions. Nine of the included studies found significant effect of interventions.  
12  
13

14 A RCT by Naik[28] measure the effect of the intervention Healthy Outcomes Through Patient  
15 Empowerment (HOPE) which is a six-months goal-setting intervention targeting depression symptoms and  
16 diabetes self-care through nine telephone-delivered coaching sessions. The HOPE intervention used an  
17 electronic data warehouse to identify specific high-risk population, followed by telephone screening and  
18 training of clinicians to deliver a structured telehealth intervention. The endpoints in this study was  
19 depression symptoms with The Patient Health Questionnaire (PHQ)-9 and glycaemic control with  
20 haemoglobin A1c (HbA1c). They did not find any improvement in six-month follow-up, but found  
21 improvement in PHQ-9 after 12-month follow-up; HOPE (Mean [SD] baseline: 15,8 [4,2] to six months: 10,9  
22 [6,1] and 12 months 10,1 [6,5] ) compared with Enhanced Usual Care (EUC) (Mean [SD] baseline 16,2 [4,0]  
23 to six months 12,4[6,0]) and 12 months 12,6 [6,0]. The PHQ-9 differences between HOPE and EUC were  
24 statistically significant at six months (mean diff., 1.74; 95% CI, 0.14-3.33; P = 0.03) and 12 months (mean  
25 diff., 2.14; 95% CI, 0.18-4.10; P = 0.03).  
26  
27  
28  
29  
30  
31  
32  
33  
34

35 The study by Reed[29] examined the effect of the intervention Chronic Disease Self-Management Support  
36 (CDSMS) which is a set of tools (Partners in Health scale, Cue and Response interview, Problems and Goals  
37 assessment) and a structured process that enable clinicians and patients to collaboratively assess self-  
38 management behaviour, identify problems, set goals, and develop individual care plans that address key  
39 self-care, medical, psychosocial, and care problems. Participants in each program received three home  
40 visits and four follow-up phone calls over a six-month period from a clinician. The population were  
41 recruited from five general practices in Adelaide, Australia. The study used self-rated health as endpoint,  
42 and they with an intention-to-treat analysis that CDSMS participants were more likely than control  
43 participants to report improved self-rated health at six months (R, 2.50; 95% confidence interval, 1.13-5.50;  
44 P = 0.02).  
45  
46  
47  
48  
49  
50  
51

52 A RCT by Shively[21] implemented a six month program developed to enhance self-management in older  
53 heart failure patients. The program consisted of individualized goal setting according to baseline activation  
54 level. The interventions population was invited to participate through a follow-up visit at the Veterans  
55 Affairs San Diego Healthcare system. The study used Patient Activation Measure (PAM), Self-Care of Heart  
56  
57  
58  
59  
60



1  
2  
3  
4 Failure Index (SCHFI), Medical Outcomes Study (MOS), and hospital visits to measure the effect of the  
5 intervention. The intervention showed improvement in PAM-score, the intervention group compared with  
6 the usual care group showed a significant increase in PAM-scores from baseline to six months (significant  
7 group by time interaction,  $F = 3.73$ ,  $P = 0.03$ ) and fewer hospital visits compared with usual group.  
8  
9

10  
11 A prospective naturalistic cohort study by Tay[24] examined the effect of the intervention Care for Acute  
12 Mentally Infirm Elders (CAMIE) which adopt a person-centred care protocol with specialized psychosocial  
13 interventions, minimally obtrusive medical care, and physical restraints-free practice targeting patients  
14 with dementia. The study population were recruited at a hospital, and all patients received standard  
15 treatment. Patients were admitted to the CAMIE unit if they suffered from confusion due to dementia,  
16 with/without delirium based on the confusion assessment method criteria, and concomitant acute medical  
17 problems. The study used Modified Barthel Index function and Well-being and European Quality of Life  
18 (EuroQoL) to measure the CAMIE intervention. CAMIE patients showed statistically significant greater gains  
19 in Modified Barthel Index function (mean [SD] baseline 47.31 [28.90] to 55.58 [29.37]) and well-Being  
20 (mean [SD] baseline 4.94 [3.95] to 8.46 [3.49]), decreased ill-Being and agitation (mean [SD] baseline 3.04  
21 [2.11] to 0.84 [1.26]), and greater improvement in EuroQoL index score (mean [SD] baseline -0.16 [0.43] to  
22 0.15 [0.41]) after adjusting for baseline differences that translated to a quality-adjusted life years gain of  
23 0.045, assuming stability over three months.  
24  
25  
26  
27  
28  
29  
30  
31  
32  
33

34 A controlled before-and-after design by Ulin et al[26] studied the effect of proactive care-planning based on  
35 Gothenburg Person-Centred Care (gPCC). It seeks to identify patient's resources including motivations and  
36 goals. This information is used to develop a health plan which includes planned investigations, length of  
37 stay in hospital and treatment goals. The health plan is discussed with the patient to reach consensus and  
38 the plan is regularly evaluated. The population were recruited from five designated wards at a University  
39 Hospital in Sweden. The patients were assessed by a specialised cardiologist before final inclusion, guided  
40 by the European Society of Cardiology (ESC) guidelines for diagnosing Congestive Heart Failure (CHF). The  
41 study used discharge destination and number of days until the discharge was recorded, to measure the  
42 gPCC intervention. They found improved discharge processes (1-5 days for gPCC group vs 1-28 days for  
43 control group), and fewer days in hospital (11 days for gPCC group vs 35 days for control group).  
44  
45  
46  
47  
48  
49  
50

51 A RCT by Willadsen[30] examined the effect of structured personal diabetes care with general practitioners  
52 (GPs) that ask GPs and patient to agree on the best possible goal for controlling risk factors. GPs were  
53 offered six seminars and were instructed to give advice lifestyle. Patients were invited to attend follow-up  
54 examination quarterly and screening for diabetes complications every year. The study used self-rated  
55 health and diabetes symptoms to measure the effect of the structured person care intervention. They  
56  
57  
58  
59  
60

1  
2  
3  
4 found that the intervention reduced the diabetes symptoms (OR 0.79; 95% CI: 0.64–0.97), but they didn't  
5  
6 find the same after 14 years follow-up.  
7

8 An observational matched cohort study by Wong[25] implemented a Patient Empowerment Programme  
9 (PEP) that aims to provide patient with knowledge and skills about their disease Type 2 Diabetes (T2DM)  
10 and to facilitate autonomous self-regulation. The program consisted of generic sessions about self-efficacy  
11 enhancement and lifestyle modification as well as disease-specific sessions for a period of up to 12 months.  
12  
13 Two non-government organisations (NGO) delivered the intervention, the NGO's invited at general  
14 outpatients' clinics or family medicine specialist eligible patients to join the PEP. The study used HbA1c,  
15 Systolic Blood Pressure (SBP), Diastolic Blood Pressure (DBP), and Low-Density Lipoprotein (LDL-C) to  
16 measure the effect of PEP. They found improvement in the clinical outcomes. A significantly greater  
17 percentage of patients in the PEP group attained HbA1C  $\leq 7\%$  or LDL-C  $\leq 2.6$  mmol/L at 12-month follow-up  
18 compared with the non-PEP group. PEP group had a mean 0.813 fewer General Outpatient Clinic (GOPC)  
19 visits in comparison with the non-PEP group.  
20  
21  
22  
23  
24  
25  
26

27 A study by Hochhalter[23] measured the effect of Making the Most of Your Healthcare intervention which  
28 offered tools and taught skills to (a) prepare for healthcare appointments, (b) communicate effectively and  
29 gather information and support during healthcare appointments, and (c) follow through on plans of care.  
30  
31 The intervention included a two-hour workshop and two telephone calls individualized to the patient's pre-  
32 and post-healthcare appointment needs. The included population were patients in a large Internal  
33 Medicine Clinic and had been treated for at least two of seven chronic illnesses. They found a statistically  
34 significant improvement in self-efficacy for the intervention group, who received a 2-hour workshop. They  
35 used PAM-13 and Health Related Quality of Life (HRQOL)-14 questionnaires as measurement. They found  
36 an improvement in Self-Efficacy in the Appointment group (mean [SD] baseline 6,9 [1,9] to 7,4 [1,8]) mean  
37 diff. 0,47 95%CI; 0,07-0,87 P = 0,021. They did not find any improvement in health for the control group or  
38 safety group.  
39  
40  
41  
42  
43  
44  
45

46 A quasi-experimental study by Mateo-Abad [27] examined the impact of the CareWell integrated care  
47 model on use of health resources and clinical effectiveness. The program is based on coordination between  
48 health providers, patient empowerment and home-based care, supported by communication and  
49 information technology tools. Relevant differences were observed between the intervention and control  
50 group, including reduced numbers of hospitalisations and visits to emergency centres, and clinical  
51 outcomes in the intervention group. For instance, when hospitalised their hospital stay was longer for the  
52 control group; the mean number of days in the hospital was 13.3 (SD,13.5), whereas the mean stay for the  
53 intervention group was 10.4 (SD, 9) days.  
54  
55  
56  
57  
58  
59  
60

1  
2  
3  
4 Whereas the studies described above did show some improvements of patient-engagement interventions  
5 in multi-morbid older patients based on a range of outcomes, the following three studies did not find any  
6 significant improvements in health outcomes.  
7  
8

9  
10 A pragmatic cluster-randomised trial by Salisbury[22] examined the effect of the so-called 3D intervention  
11 which is based on a patient-centred care model and seeks to improve continuity, coordination, and  
12 efficiency of care by replacing disease-focused reviews of each health condition with one 6-monthly  
13 comprehensive multidisciplinary review. Each 3D review consists of two appointments with a nurse and a  
14 named responsible physician and a records-based medication review by a pharmacist. The population were  
15 recruited from three general practices providing National Health Service (NHS) primary medical in England  
16 and Scotland. They measured quality of life with a 5Q-5D-5L questionnaire. The intention-to-treat analysis  
17 showed no difference between trial groups (adjusted difference in mean EQ-5D-5L 0.00, 95% CI -0.02 to  
18 0.02;  $p=0.93$ ). They concluded the intervention did not improve the participant's quality of life.  
19  
20  
21  
22  
23  
24

25  
26 The study by Tinsel[20] implemented a shared decision-making (SDM) training program that aims to  
27 enhance the active role of patients. The program included disease information, physician-patient  
28 communication, steps of SDM, motivational interviewing, decision table listing, and role plays simulating  
29 consultations. The GP's followed a SDM training programme, and the study population was conducted  
30 through GP's in southwest Germany. They used change of patients' perceived participation (SDM-Q-9) and  
31 change in systolic blood pressure (BP). According to the mixed model analysis, the average change from TO  
32 was 3.11 points higher in the intervention group than in the control group (97.5% CI [-2.37; 8.61],  $p =$   
33 0.203). The effect was not significant at the (Bonferroni-corrected) 2.5% level. They did not find any  
34 statistically significant improvement in systolic BP.  
35  
36  
37  
38  
39  
40

41  
42 The study by Schwarze et al [31] measured the effect of a question prompt list (QPL) intervention versus  
43 usual care among older patients. The QPL intervention target informational needs of patients considering  
44 major surgery and include 11 questions that prompt patients and their family members to query their  
45 surgeon about treatment options etc. The study population was conducted among surgeons who perform  
46 high-risk oncologic or vascular operations on older patients with comorbidities. They measured patient  
47 engagement and well-being, including anxiety in patients. For instance, on average, anxiety scores were 1.3  
48 (95% CI, 0.2-2.4) points higher for patients in the QPL intervention group. The authors concluded that these  
49 effects were less than the minimally important difference and that the QPL intervention in general did not  
50 influence patient engagement and well-being compared with usual care.  
51  
52  
53  
54  
55  
56  
57  
58  
59  
60

## DISCUSSION

### Statement of principal findings

This systematic review aimed to provide an overview of the effects of patient engagement interventions for older patients with multi-morbidity. From the 805 studies identified, only twelve studies met the inclusion criteria. The included studies were heterogeneous in characteristics of populations, number of participants, types of interventions to enhance patient-engagement, length of follow-up and outcome measures. A range of interventions ranging from prompt list to coaching sessions. This diversity in the evidence base challenges the ability to draw robust conclusions. Overall, the majority of studies showed improvements in health and patient-reported outcomes among patients participating in patient engagement interventions. There was some evidence to indicate that the clinical outcomes (BP, Hba1c, diabetes symptoms and glycaemic outcomes) were improved. Furthermore, some evidence indicates improvements in quality of life (EuroQol, QALY, self-rated health) and fewer health care visits (hospitals, GOPC). However, one study found no significant improvements in quality of life, another study found no significant improvements in patient well-being and anxiety symptoms, and a third study found no significant improvements in BP. As indicated by the limited number of studies and the wide heterogeneity in characteristics of populations, types of interventions to enhance patient-engagement, outcome measures and length of follow-up, there is a need for more substantial studies evaluating patient-engagement tools for both implementation and effect in older patients with multi-morbidity using more longer-term outcomes to capture both patient, provider and system-level effects of patient-engagement. While our review adds to the important field of ensuring that interventions to enhance patient-engagement are developed, implemented and evaluated specifically in the growing population of older adults living with multi-morbidity, the review supports previous work in finding too fragile evidence for robust conclusions to be made.[10-15]

### Strengths

This review has several strengths. This review contributes to providing a more substantive evidence base to guide prioritisation and implementation into mainstream healthcare delivery. Since patient-engagement aims at improving care overall, this review did not restrict itself to studies based on particular health outcomes, and consequently studies into a range of health and patient-reported outcomes were included. Another strength is that the systematic literature search that was undertaken adhering to a pre-specified protocol. To standardise our assessment process, we used DistillerSR to upload the bibliographic reference information. We performed a wide search to allow different study designs to include methodological heterogeneity. However, the majority of the included studies were RCT. Two researchers independently selected studies collected data and rated quality of included studies using GRADE method. Discrepancies

1  
2  
3  
4  
5  
6  
7  
8  
9  
10  
11  
12  
13  
14  
15  
16  
17  
18  
19  
20  
21  
22  
23  
24  
25  
26  
27  
28  
29  
30  
31  
32  
33  
34  
35  
36  
37  
38  
39  
40  
41  
42  
43  
44  
45  
46  
47  
48  
49  
50  
51  
52  
53  
54  
55  
56  
57  
58  
59  
60

were resolved by consensus. We used a transparent framework for developing and presenting summaries of evidence. GRADE is the most widely adopted tool for grading the quality of evidence.

### **Limitations**

Despite of the systematic approach adopted; this review has its limitations. The literature search was completed using two key databases, but additional peer-reviewed articles might have been found by searching and including from a broader range of sources. Relevant articles were excluded if they were published in languages other than English, Danish, Swedish, or Norwegian. Another limitation relates to the differences in transparency as to population characteristics across articles which affected our ability to ascertain types of multi-morbid conditions and the extent of multi-morbidity in the study populations. A minority of the included studies had small participant numbers which might have affected power of the studies. Two studies included less than 100 patients in total. Meta-analysis was not conducted as there was heterogeneity in the outcomes and measurement tools used in the studies. Overall, the quality of the included studies was of low to moderate. Some aspects of quality assessment and risk of bias were unclear across the included studies. This complicates the overall quality assessment. Furthermore, we did not seek clarification with the study authors about whether our assessment of risk of bias in the individual studies was correct.

### **Implications**

This review has highlighted the possible improvements in health and patient-reported outcomes among patients exposed to patient-engagement interventions. However, the evidence base is inconsistent and the quality of the studies is relatively low. Further high quality studies in larger populations over longer time-periods are needed to investigate the long-term effect of patient-engagement interventions.

### **CONCLUSION**

This systematic review found only limited evidence to support the improvements in health and patient-reported outcomes among older multi-morbid patients exposed to patient-engagement interventions. As the quality of the included studies was mostly low, the findings should be interpreted with caution, and there is a need for more robust studies into efficient approaches to engaging older adults with multi-morbidity in care trajectories.

### **DECLARATION OF CONFLICTING INTERESTS**

1  
2  
3  
4 The authors declare no potential conflicts of interest with respect to the research, authorship and/or  
5 publication of this article  
6  
7

#### 8 9 **FUNDING**

10 The authors disclosed receipt of the following financial support for the research, authorship, and/or  
11 publication of this article: This work was supported by [Nordea-fonden] grant number [02-2013-0200].  
12  
13  
14

#### 15 16 **AUTHOR CONTRIBUTIONS**

17 MBS and KA contributed equally to this paper. MK, MBS and KA designed the study. MBS and KA carried  
18 out data collection and analysis. All authors contributed to drafting the manuscript. All authors have read  
19 and approved the manuscript.  
20  
21  
22

#### 23 24 **DATA AVAILABILITY STATEMENT**

25 Data from the literature search and selection process are available upon reasonable request to the  
26 corresponding author.  
27  
28  
29

#### 30 31 **FIGURES**

32 Figure 1: Flowchart

33 Figure 2: Total GRADE

34 Figure 3: Risk of bias for randomised studies

35 Figure 4: Risk of bias for non-randomised studies  
36  
37  
38  
39

#### 40 41 **ETHICS STATEMENT**

42 According to national guidelines, no ethics approval is needed for systematic reviews  
43  
44  
45

#### 46 47 **REFERENCES**

- 48 1. *J Am Geriatr Soc*. Person-Centered Care: A Definition and Essential Elements. Journal of the American  
49 Geriatrics Society. 2016;64(1):15-8.
- 50 2. Hargraves I, Montori VM, Tilburt JC. Curare Aude-Caring for Patients, with Them. *J Clin Ethics*.  
51 2020;31(1):79-82.
- 52 3. Pieterse AH, Stiggelbout AM, Montori VM. Shared decision making and the importance of time. *JAMA*.  
53 2019;322(1):25-6.  
54  
55  
56  
57  
58  
59  
60

1  
2  
3  
4  
5  
6  
7  
8  
9  
10  
11  
12  
13  
14  
15  
16  
17  
18  
19  
20  
21  
22  
23  
24  
25  
26  
27  
28  
29  
30  
31  
32  
33  
34  
35  
36  
37  
38  
39  
40  
41  
42  
43  
44  
45  
46  
47  
48  
49  
50  
51  
52  
53  
54  
55  
56  
57  
58  
59  
60

4. Johnston MC, Crilly M, Black C, Prescott GJ, Mercer SW. Defining and measuring multimorbidity: a systematic review of systematic reviews. *European journal of public health*. 2019;29(1):182-9.
5. Davies LE, Spiers G, Kingston A, Todd A, Adamson J, Hanratty B. Adverse Outcomes of Polypharmacy in Older People: Systematic Review of Reviews. *Journal of the American Medical Directors Association*. 2020;21(2):181-7.
6. Uijen AA, van de Lisdonk EH. Multimorbidity in primary care: Prevalence and trend over the last 20 years. *EJGP*. 2008;14(sup1):28-32.
7. van Oostrom SH, Gijzen R, Stirbu I, Korevaar JC, Schellevis FG, Picavet HSJ, et al. Time Trends in Prevalence of Chronic Diseases and Multimorbidity Not Only due to Aging: Data from General Practices and Health Surveys. *PloS one*. 2016;11(8):e0160264.
8. Spencer-Bonilla G, Thota A, Organick P, Ponce OJ, Kunneman M, Giblon R, et al. Normalization of a conversation tool to promote shared decision making about anticoagulation in patients with atrial fibrillation within a practical randomized trial of its effectiveness: a cross-sectional study. *Trials*. 2020;21:1-10.
9. Fernando AT, Arroll B, Consedine NS. Enhancing compassion in general practice: it's not all about the doctor. *BJGP*; 2016.
10. Sepucha KR, Simmons LH, Barry MJ, Edgman-Levitan S, Licurse AM, Chaguturu SK. Ten years, forty decision aids, and thousands of patient uses: shared decision making at Massachusetts General Hospital. *Health Aff*. 2016;35(4):630-6.
11. Rashid A. Choosing Together: encouraging person centred care and shared decision making. *BMJ (Clinical research ed)*. 2015;350.
12. Barry MJ, Edgman-Levitan S. Shared decision making—The pinnacle patient-centered care. *Apa PsycNET*. 2012.
13. Plsek P. *Crossing the Quality Chasm: A New Health System for the 21st Century*: The national academies of medicine; 2001.
14. Montori VM, Kunneman M, Brito JP. Shared decision making and improving health care: the answer is not in. *Jama*. 2017;318(7):617-8.
15. Butterworth J, Hays R, McDonagh S, Bower P, Pitchforth E, Richards S, et al. Involving older people with multimorbidity in decision-making about their primary healthcare: A Cochrane systematic review of interventions (abridged). *Patient Educ Couns*. 2020.
16. Elwyn G, Frosch DL, Kobrin S. Implementing shared decision-making: consider all the consequences. *Implement Sci*. 2015;11(1):114.



17. Guyatt G, Oxman AD, Akl EA, Kunz R, Vist G, Brozek J, et al. GRADE guidelines: 1. Introduction-GRADE evidence profiles and summary of findings tables. *Journal of clinical epidemiology*. 2011;64(4):383-94.
18. Sterne JA, Hernán MA, Reeves BC, Savović J, Berkman ND, Viswanathan M, et al. ROBINS-I: a tool for assessing risk of bias in non-randomised studies of interventions. *BMJ (Clinical research ed)*. 2016;355:i4919.
19. Higgins JP, Altman DG, Gøtzsche PC, Jüni P, Moher D, Oxman AD, et al. The Cochrane Collaboration's tool for assessing risk of bias in randomised trials. *BMJ (Clinical research ed)*. 2011;343:d5928.
20. Tinsel I, Buchholz A, Vach W, Siegel A, Dürk T, Buchholz A, et al. Shared decision-making in antihypertensive therapy: a cluster randomised controlled trial. *BMC family practice*. 2013;14(1):135.
21. Shively MJ, Gardetto NJ, Kodiath MF, Kelly A, Smith TL, Stepnowsky C, et al. Effect of patient activation on self-management in patients with heart failure. *J Cardiovasc Nurs*. 2013;28(1):20-34.
22. Salisbury C, Man M-S, Bower P, Guthrie B, Chaplin K, Gaunt DM, et al. Management of multimorbidity using a patient-centred care model: a pragmatic cluster-randomised trial of the 3D approach. *Lancet Glob Health*. 2018;392(10141):41-50.
23. Hochhalter AK, Song J, Rush J, Sklar L, Stevens A. Making the most of your healthcare intervention for older adults with multiple chronic illnesses. *Patient Educ Couns*. 2010;81(2):207-13.
24. Tay FHE, Thompson CL, Nieh CM, Nieh CC, Koh HM, Tan JJC, et al. Person-centered care for older people with dementia in the acute hospital. *Alzheimers Dement (N Y)*. 2018;4:19-27.
25. Wong CK, Wong WC, Lam CL, Wan Y, Wong WH, Chung K, et al. Effects of Patient Empowerment Programme (PEP) on clinical outcomes and health service utilization in type 2 diabetes mellitus in primary care: an observational matched cohort study. *PloS one*. 2014;9(5):e95328.
26. Ulin K, Olsson L-E, Wolf A, Ekman I. Person-centred care—An approach that improves the discharge process. *Eur J Cardiovasc Nurs*. 2016;15(3):e19-e26.
27. Mateo-Abad M, González N, Fullaondo A, Merino M, Azkargorta L, Giné A, et al. Impact of the CareWell integrated care model for older patients with multimorbidity: a quasi-experimental controlled study in the Basque Country. *BMC health services research*. 2020;20(1):613.
28. Naik AD, Hundt NE, Vaughan EM, Petersen NJ, Zeno D, Kunik ME, et al. Effect of Telephone-Delivered Collaborative Goal Setting and Behavioral Activation vs Enhanced Usual Care for Depression Among Adults With Uncontrolled Diabetes: A Randomized Clinical Trial. *JAMA network open*. 2019;2(8):e198634.
29. Reed RL, Roeger L, Howard S, Oliver-Baxter JM, Battersby MW, Bond M, et al. A self-management support program for older Australians with multiple chronic conditions: a randomised controlled trial. *Med J Aust*. 2018;208(2):69-74.



1  
2  
3  
4  
5  
6  
7  
8  
9  
10  
11  
12  
13  
14  
15  
16  
17  
18  
19  
20  
21  
22  
23  
24  
25  
26  
27  
28  
29  
30  
31  
32  
33  
34  
35  
36  
37  
38  
39  
40  
41  
42  
43  
44  
45  
46  
47  
48  
49  
50  
51  
52  
53  
54  
55  
56  
57  
58  
59  
60

30. Willadsen TG, Siersma V, Nielsen ABS, K ster-Rasmussen R, Guassora AD, Jarb l DE, et al. The effect of structured personal care on diabetes symptoms and self-rated health over 14 years after diabetes diagnosis. *Prim Care Diabetes*. 2018;12(4):354-63.

31. Schwarze ML, Buffington A, Tucholka JL, Hanlon B, Rathouz PJ, Marka N, et al. Effectiveness of a Question Prompt List Intervention for Older Patients Considering Major Surgery: A Multisite Randomized Clinical Trial. *JAMA surgery*. 2020;155(1):6-13.

For peer review only

Figure 1: Flowchart



Figure 2: Total GRADE



Peer review only

Figure 3: Risk of bias for randomised studies



review only

1  
2  
3  
4  
5  
6  
7  
8  
9  
10  
11  
12  
13  
14  
15  
16  
17  
18  
19  
20  
21  
22  
23  
24  
25  
26  
27  
28  
29  
30  
31  
32  
33  
34  
35  
36  
37  
38  
39  
40  
41  
42  
43  
44  
45  
46  
47  
48  
49  
50  
51  
52  
53  
54  
55  
56  
57  
58  
59  
60

Figure 4: Risk of bias for non-randomised studies

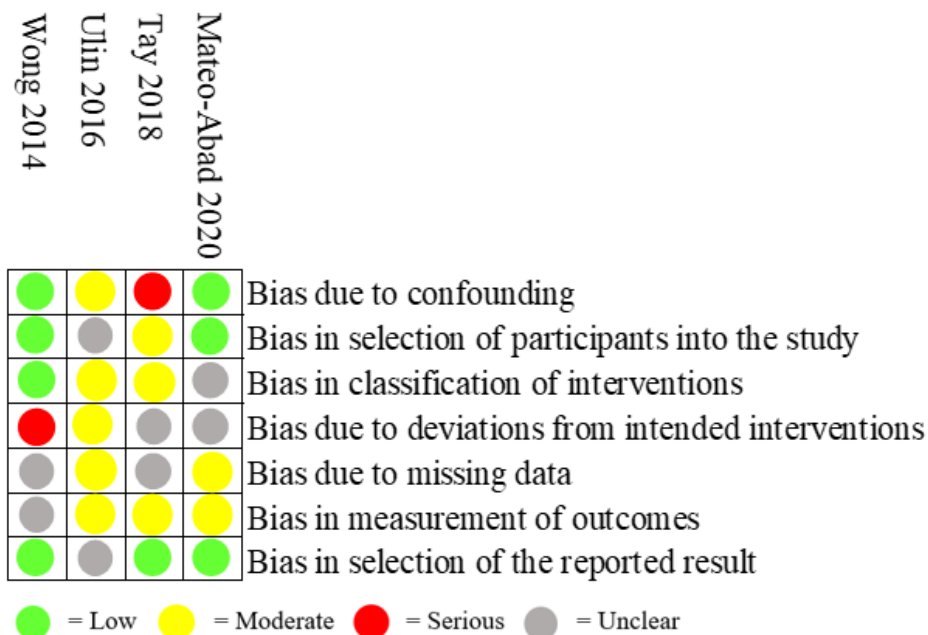

review only

Appendix 1: Keywords and search string

| <b>Aspect 1:</b><br>Patient engagement | <b>AND</b> | <b>Aspect 2:</b><br>Multimorbidity    | <b>AND</b> | <b>Aspect:</b><br>Elderly |
|----------------------------------------|------------|---------------------------------------|------------|---------------------------|
| Person-centered care                   |            | Multimorbidity (MeSH)                 |            | Aged (MeSH)               |
| OR                                     |            | OR                                    |            | OR                        |
| Person centered care                   |            | Multi-morbidity                       |            | Aged                      |
| OR                                     |            | OR                                    |            | OR                        |
| Patient engagement                     |            | Multimorbidity                        |            | Elderly                   |
| OR                                     |            | OR                                    |            | OR                        |
| Patient empowerment                    |            | Multi-morbidities                     |            | Older adult               |
| OR                                     |            | OR                                    |            | OR                        |
| Patient involvement                    |            | Multi morbidities                     |            | Older adults              |
| OR                                     |            | OR                                    |            |                           |
| Patient participation<br>(MeSH)        |            | Comorbidity (MeSH)                    |            |                           |
|                                        |            | OR                                    |            |                           |
|                                        |            | Comorbidity                           |            |                           |
|                                        |            | OR                                    |            |                           |
|                                        |            | Co-morbidity                          |            |                           |
|                                        |            | OR                                    |            |                           |
|                                        |            | Comorbidities                         |            |                           |
|                                        |            | OR                                    |            |                           |
|                                        |            | Co-morbidities                        |            |                           |
|                                        |            | OR                                    |            |                           |
|                                        |            | Multiple chronic<br>conditions (MeSH) |            |                           |

1  
2  
3  
4  
5  
6 ("person-centered care"[All Fields] OR "person-centered care"[All Fields] OR "patient engagement"[All  
7 Fields] OR "patient empowerment"[All Fields] OR "patient involvement"[All Fields] OR "patient  
8 participation"[All Fields] OR "patient participation"[MeSH Terms]) AND ("multimorbidity"[MeSH Terms] OR  
9 "multi-morbidity"[All Fields] OR "multi-morbidity"[All Fields] OR ("multimorbid"[All Fields] OR  
10 "multimorbidities"[All Fields] OR "multimorbidity"[MeSH Terms] OR "multimorbidity"[All Fields]) OR  
11 ("multimorbid"[All Fields] OR "multimorbidities"[All Fields] OR "multimorbidity"[MeSH Terms] OR  
12 "multimorbidity"[All Fields]) OR "multi-morbidities"[All Fields] OR "multi-morbidities"[All Fields] OR  
13 "comorbidity"[MeSH Terms] OR ("comorbid"[All Fields] OR "comorbidity"[MeSH Terms] OR  
14 "comorbidity"[All Fields] OR "comorbidities"[All Fields] OR "comorbids"[All Fields]) OR  
15 ("comorbidity"[MeSH Terms] OR "comorbidity"[All Fields] OR ("co"[All Fields] AND "morbidity"[All Fields])  
16 OR "co morbidity"[All Fields]) OR "co-morbidities"[All Fields] OR ("comorbid"[All Fields] OR  
17 "comorbidity"[MeSH Terms] OR "comorbidity"[All Fields] OR "comorbidities"[All Fields] OR "comorbids"[All  
18 Fields]) OR "multiple chronic conditions"[MeSH Terms] OR "multiple chronic diseases"[All Fields]) AND  
19 ("aged"[MeSH Terms] OR ("aged"[MeSH Terms] OR "aged"[All Fields]) OR ("aged"[MeSH Terms] OR  
20 "aged"[All Fields] OR "elderly"[All Fields] OR "elderlies"[All Fields] OR "elderly s"[All Fields] OR "elderlys"[All  
21 Fields]) OR "older adults"[All Fields] OR "older adult"[All Fields])



# PRISMA 2009 Checklist

1  
2  
3  
4  
5  
6  
7  
8  
9  
10  
11  
12  
13  
14  
15  
16  
17  
18  
19  
20  
21  
22  
23  
24  
25  
26  
27  
28  
29  
30  
31  
32  
33  
34  
35  
36  
37  
38  
39  
40  
41  
42  
43  
44  
45  
46  
47

| Section/topic                      | #  | Checklist item                                                                                                                                                                                                                                                                                              | Reported on page # |
|------------------------------------|----|-------------------------------------------------------------------------------------------------------------------------------------------------------------------------------------------------------------------------------------------------------------------------------------------------------------|--------------------|
| <b>TITLE</b>                       |    |                                                                                                                                                                                                                                                                                                             |                    |
| Title                              | 1  | Identify the report as a systematic review, meta-analysis, or both.                                                                                                                                                                                                                                         | 1                  |
| <b>ABSTRACT</b>                    |    |                                                                                                                                                                                                                                                                                                             |                    |
| Structured summary                 | 2  | Provide a structured summary including, as applicable: background; objectives; data sources; study eligibility criteria, participants, and interventions; study appraisal and synthesis methods; results; limitations; conclusions and implications of key findings; systematic review registration number. | 2                  |
| <b>INTRODUCTION</b>                |    |                                                                                                                                                                                                                                                                                                             |                    |
| Rationale                          | 3  | Describe the rationale for the review in the context of what is already known.                                                                                                                                                                                                                              | 4                  |
| Objectives                         | 4  | Provide an explicit statement of questions being addressed with reference to participants, interventions, comparisons, outcomes, and study design (PICOS).                                                                                                                                                  | 5                  |
| <b>METHODS</b>                     |    |                                                                                                                                                                                                                                                                                                             |                    |
| Protocol and registration          | 5  | Indicate if a review protocol exists, if and where it can be accessed (e.g., Web address), and, if available, provide registration information including registration number.                                                                                                                               | Not applicable     |
| Eligibility criteria               | 6  | Specify study characteristics (e.g., PICOS, length of follow-up) and report characteristics (e.g., years considered, language, publication status) used as criteria for eligibility, giving rationale.                                                                                                      | 5-9                |
| Information sources                | 7  | Describe all information sources (e.g., databases with dates of coverage, contact with study authors to identify additional studies) in the search and date last searched.                                                                                                                                  | 5                  |
| Search                             | 8  | Present full electronic search strategy for at least one database, including any limits used, such that it could be repeated.                                                                                                                                                                               | Appendix 1         |
| Study selection                    | 9  | State the process for selecting studies (i.e., screening, eligibility, included in systematic review, and, if applicable, included in the meta-analysis).                                                                                                                                                   | 5                  |
| Data collection process            | 10 | Describe method of data extraction from reports (e.g., piloted forms, independently, in duplicate) and any processes for obtaining and confirming data from investigators.                                                                                                                                  | 5-6                |
| Data items                         | 11 | List and define all variables for which data were sought (e.g., PICOS, funding sources) and any assumptions and simplifications made.                                                                                                                                                                       | 5                  |
| Risk of bias in individual studies | 12 | Describe methods used for assessing risk of bias of individual studies (including specification of whether this was done at the study or outcome level), and how this information is to be used in any data synthesis.                                                                                      | 6                  |
| Summary measures                   | 13 | State the principal summary measures (e.g., risk ratio, difference in means).                                                                                                                                                                                                                               | N/A                |
| Synthesis of results               | 14 | Describe the methods of handling data and combining results of studies, if done, including measures of consistency (e.g., $I^2$ ) for each meta-analysis.                                                                                                                                                   | Not applicable     |





# PRISMA 2009 Checklist

Page 1 of 2

| Section/topic                 | #  | Checklist item                                                                                                                                                                                           | Reported on page # |
|-------------------------------|----|----------------------------------------------------------------------------------------------------------------------------------------------------------------------------------------------------------|--------------------|
| Risk of bias across studies   | 15 | Specify any assessment of risk of bias that may affect the cumulative evidence (e.g., publication bias, selective reporting within studies).                                                             | 6, 11-12           |
| Additional analyses           | 16 | Describe methods of additional analyses (e.g., sensitivity or subgroup analyses, meta-regression), if done, indicating which were pre-specified.                                                         | Not applicable     |
| <b>RESULTS</b>                |    |                                                                                                                                                                                                          |                    |
| Study selection               | 17 | Give numbers of studies screened, assessed for eligibility, and included in the review, with reasons for exclusions at each stage, ideally with a flow diagram.                                          | 6, Figure 1        |
| Study characteristics         | 18 | For each study, present characteristics for which data were extracted (e.g., study size, PICOS, follow-up period) and provide the citations.                                                             | 6-10               |
| Risk of bias within studies   | 19 | Present data on risk of bias of each study and, if available, any outcome level assessment (see item 12).                                                                                                | 9-10               |
| Results of individual studies | 20 | For all outcomes considered (benefits or harms), present, for each study: (a) simple summary data for each intervention group (b) effect estimates and confidence intervals, ideally with a forest plot. | 10-13              |
| Synthesis of results          | 21 | Present results of each meta-analysis done, including confidence intervals and measures of consistency.                                                                                                  | Not applicable     |
| Risk of bias across studies   | 22 | Present results of any assessment of risk of bias across studies (see Item 15).                                                                                                                          | Figure 3 and 4     |
| Additional analysis           | 23 | Give results of additional analyses, if done (e.g., sensitivity or subgroup analyses, meta-regression [see Item 16]).                                                                                    | Not applicable     |
| <b>DISCUSSION</b>             |    |                                                                                                                                                                                                          |                    |
| Summary of evidence           | 24 | Summarize the main findings including the strength of evidence for each main outcome; consider their relevance to key groups (e.g., healthcare providers, users, and policy makers).                     | 14-15              |
| Limitations                   | 25 | Discuss limitations at study and outcome level (e.g., risk of bias), and at review-level (e.g., incomplete retrieval of identified research, reporting bias).                                            | 15                 |
| Conclusions                   | 26 | Provide a general interpretation of the results in the context of other evidence, and implications for future research.                                                                                  | 15                 |
| <b>FUNDING</b>                |    |                                                                                                                                                                                                          |                    |
| Funding                       | 27 | Describe sources of funding for the systematic review and other support (e.g., supply of data); role of funders for the systematic review.                                                               | 16                 |

From: Moher D, Liberati A, Tetzlaff J, Altman DG, The PRISMA Group (2009). Preferred Reporting Items for Systematic Reviews and Meta-Analyses: The PRISMA Statement. PLoS Med 6(7): e1000097. doi:10.1371/journal.pmed1000097

For more information on this journal visit [www.bmj.com/journal/319](http://www.bmj.com/journal/319) or [www.prismastatement.com](http://www.prismastatement.com)

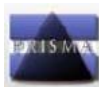

# PRISMA 2009 Checklist

For peer review only

- 1
- 2
- 3
- 4
- 5
- 6
- 7
- 8
- 9
- 10
- 11
- 12
- 13
- 14
- 15
- 16
- 17
- 18
- 19
- 20
- 21
- 22
- 23
- 24
- 25
- 26
- 27
- 28
- 29
- 30
- 31
- 32
- 33
- 34
- 35
- 36
- 37
- 38
- 39
- 40
- 41
- 42
- 43
- 44
- 45
- 46
- 47
