# Supplementary material for: Systematic review of patient-engagement interventions: potentials for enhancing person-centred care for older patients with multimorbidity
Source: PubMed Central journal article supplement — BMJ Open. 2021 Dec 16;11(12):e048558. doi: 10.1136/bmjopen-2020-048558 (PMC8679112; doi:10.1136/bmjopen-2020-048558), 2021-12-16
Supplement: bmjopen-2020-048558supp001.pdf [file bmjopen-2020-048558supp001.pdf]

## Appendix 1: Keywords and search string

| <b>Aspect 1:</b><br>Patient engagement | <b>AND</b> | <b>Aspect 2:</b><br>Multimorbidity    | <b>AND</b> | <b>Aspect:</b><br>Elderly |
|----------------------------------------|------------|---------------------------------------|------------|---------------------------|
| Person-centered care                   |            | Multimorbidity (MeSH)                 |            | Aged (MeSH)               |
| OR                                     |            | OR                                    |            | OR                        |
| Person centered care                   |            | Multi-morbidity                       |            | Aged                      |
| OR                                     |            | OR                                    |            | OR                        |
| Patient engagement                     |            | Multimorbidity                        |            | Elderly                   |
| OR                                     |            | OR                                    |            | OR                        |
| Patient empowerment                    |            | Multi-morbidities                     |            | Older adult               |
| OR                                     |            | OR                                    |            | OR                        |
| Patient involvement                    |            | Multi morbidities                     |            | Older adults              |
| OR                                     |            | OR                                    |            |                           |
| Patient participation<br>(MeSH)        |            | Comorbidity (MeSH)                    |            |                           |
|                                        |            | OR                                    |            |                           |
|                                        |            | Comorbidity                           |            |                           |
|                                        |            | OR                                    |            |                           |
|                                        |            | Co-morbidity                          |            |                           |
|                                        |            | OR                                    |            |                           |
|                                        |            | Comorbidities                         |            |                           |
|                                        |            | OR                                    |            |                           |
|                                        |            | Co-morbidities                        |            |                           |
|                                        |            | OR                                    |            |                           |
|                                        |            | Multiple chronic<br>conditions (MeSH) |            |                           |

("person-centered care"[All Fields] OR "person-centered care"[All Fields] OR "patient engagement"[All Fields] OR "patient empowerment"[All Fields] OR "patient involvement"[All Fields] OR "patient participation"[All Fields] OR "patient participation"[MeSH Terms]) AND ("multimorbidity"[MeSH Terms] OR "multi-morbidity"[All Fields] OR "multi-morbidity"[All Fields] OR ("multimorbid"[All Fields] OR "multimorbidities"[All Fields] OR "multimorbidity"[MeSH Terms] OR "multimorbidity"[All Fields]) OR ("multimorbid"[All Fields] OR "multimorbidities"[All Fields] OR "multimorbidity"[MeSH Terms] OR "multimorbidity"[All Fields]) OR "multi-morbidities"[All Fields] OR "multi-morbidities"[All Fields] OR "comorbidity"[MeSH Terms] OR ("comorbid"[All Fields] OR "comorbidity"[MeSH Terms] OR "comorbidity"[All Fields] OR "comorbidities"[All Fields] OR "comorbids"[All Fields]) OR ("comorbidity"[MeSH Terms] OR "comorbidity"[All Fields] OR ("co"[All Fields] AND "morbidity"[All Fields]) OR "co morbidity"[All Fields]) OR "co-morbidities"[All Fields] OR ("comorbid"[All Fields] OR "comorbidity"[MeSH Terms] OR "comorbidity"[All Fields] OR "comorbidities"[All Fields] OR "comorbids"[All Fields]) OR "multiple chronic conditions"[MeSH Terms] OR "multiple chronic diseases"[All Fields]) AND ("aged"[MeSH Terms] OR ("aged"[MeSH Terms] OR "aged"[All Fields]) OR ("aged"[MeSH Terms] OR "aged"[All Fields] OR "elderly"[All Fields] OR "elderlies"[All Fields] OR "elderly s"[All Fields] OR "elderlys"[All Fields]) OR "older adults"[All Fields] OR "older adult"[All Fields])
